# Supplementary material for: Unusual effects of the bulky 1-norbornyl group in cobalt carbonyl chemistry: low-energy structures with agostic hydrogen atoms
Source: Royal Society of Chemistry journal article supplement (doi:10.1039/d0nj01320j), 2020-01-01
Supplement: d0nj01320j2.pdf [file d0nj01320j2.pdf]

# Unusual Effects of the Bulky 1-Norbornyl Group in Cobalt Carbonyl Chemistry: Low-Energy Structures with Agostic Hydrogen Atoms

Huidong Li,<sup>a</sup> Ze Zhang,<sup>a</sup> Linshen Wang,<sup>a</sup> Di Wan, Yucheng Hu,<sup>a</sup> Qunchao Fan,<sup>a\*</sup>  
R. Bruce King,<sup>b\*</sup> and Henry F. Schaefer, III<sup>b</sup>

<sup>a</sup> *School of Science, Key Laboratory of High Performance Scientific Computation, Xihua University, Chengdu, China 610039*

<sup>b</sup> *Center for Computational Quantum Chemistry, University of Georgia, Athens, Georgia, USA 30602*

[rbking@chem.uga.edu](mailto:rbking@chem.uga.edu); [fanqunchao@sina.com](mailto:fanqunchao@sina.com).

## Supporting Information

**Tables S1 to S10:** Optimized coordinates of the (nor)Co(CO)<sub>n</sub> structures (*n* = 1 to 4) calculated at the B3PW91-D3/DZP level and B3PW91-D3/cc-pVTZ level.

**Tables S11 to S25:** Optimized coordinates of the (nor)<sub>2</sub>Co<sub>2</sub>(CO)<sub>n</sub> structures (*n* = 5 to 7) calculated at the B3PW91-D3/DZP level and B3PW91-D3/cc-pVTZ level.

**Tables S26 to S40:** Harmonic vibrational frequencies (in cm<sup>-1</sup>) and infrared intensities (in parentheses, in km/mol) for (nor)<sub>2</sub>Co<sub>2</sub>(CO)<sub>n</sub> structures (*n* = 5 to 7) calculated at the B3PW91-D3/DZP level.

Complete Gaussian09 reference (Reference 22).

**Table S1.** Optimized coordinates for the (nor)Co(CO)<sub>4</sub> structure **4S-1**.

| B3PW91-D3/DZP |          |          | B3PW91-D3/cc-pVTZ |    |           |           |           |
|---------------|----------|----------|-------------------|----|-----------|-----------|-----------|
| x             | y        | z        | x                 | y  | z         |           |           |
| C             | -0.00404 | -2.89371 | 0.00000           | C  | 0.001217  | -2.898293 | 0.000000  |
| Co            | -0.00118 | -1.10046 | 0.00000           | Co | -0.000012 | -1.105536 | 0.000000  |
| C             | 0.07011  | 0.99643  | 0.00000           | C  | 0.072479  | 0.978465  | 0.000000  |
| C             | 0.75602  | 1.61133  | 1.24427           | C  | 0.754453  | 1.590353  | 1.240155  |
| C             | 0.24383  | 3.08446  | 1.24888           | C  | 0.241976  | 3.057574  | 1.245305  |
| C             | -0.65506 | 3.14423  | 0.00000           | C  | -0.653059 | 3.116578  | 0.000000  |
| C             | -1.28262 | 1.73830  | 0.00000           | C  | -1.276456 | 1.714899  | 0.000000  |
| C             | 0.24383  | 3.08446  | -1.24888          | C  | 0.241976  | 3.057574  | -1.245305 |
| C             | 0.75602  | 1.61133  | -1.24427          | C  | 0.754453  | 1.590353  | -1.240155 |
| C             | -0.93232 | -0.95624 | -1.52532          | C  | -0.936233 | -0.949084 | -1.523029 |
| H             | 0.46584  | 1.10173  | 2.16889           | H  | 0.463139  | 1.076418  | 2.155049  |
| H             | 1.84833  | 1.54835  | 1.17501           | H  | 1.840764  | 1.522727  | 1.171916  |
| H             | -0.33512 | 3.29221  | 2.15705           | H  | -0.336731 | 3.262362  | 2.147967  |
| H             | 1.05956  | 3.81583  | 1.20357           | H  | 1.052021  | 3.787471  | 1.203127  |
| H             | 1.05956  | 3.81583  | -1.20357          | H  | 1.052021  | 3.787471  | -1.203127 |
| H             | -0.33512 | 3.29221  | -2.15705          | H  | -0.336731 | 3.262362  | -2.147967 |
| H             | 1.84833  | 1.54835  | -1.17501          | H  | 1.840764  | 1.522727  | -1.171916 |
| H             | 0.46584  | 1.10173  | -2.16889          | H  | 0.463139  | 1.076418  | -2.155049 |
| H             | -1.89048 | 1.54374  | -0.89183          | H  | -1.878960 | 1.513846  | -0.887099 |
| H             | -1.89048 | 1.54374  | 0.89183           | H  | -1.878960 | 1.513846  | 0.887099  |
| H             | -1.36188 | 3.98140  | 0.00000           | H  | -1.355637 | 3.949788  | 0.000000  |
| C             | -0.93232 | -0.95624 | 1.52532           | C  | -0.936233 | -0.949084 | 1.523029  |
| O             | -1.54201 | -0.87722 | 2.50147           | O  | -1.539055 | -0.830222 | 2.482316  |
| O             | -1.54201 | -0.87722 | -2.50147          | O  | -1.539055 | -0.830222 | -2.482316 |
| O             | -0.00106 | -4.04475 | 0.00000           | O  | 0.007292  | -4.035178 | 0.000000  |
| C             | 1.78409  | -0.97995 | 0.00000           | C  | 1.783865  | -0.966402 | 0.000000  |
| O             | 2.93661  | -0.92320 | 0.00000           | O  | 2.918924  | -0.864821 | 0.000000  |

**Table S2.** Optimized coordinates for the (nor)Co(CO)<sub>4</sub> structure **4S-2**.

| B3PW91-D3/DZP |           |           | B3PW91-D3/cc-pVTZ |    |           |           |           |
|---------------|-----------|-----------|-------------------|----|-----------|-----------|-----------|
|               | x         | y         | z                 |    | x         | y         | z         |
| C             | -0.571776 | -2.211691 | 1.256982          | C  | -0.568550 | -2.167176 | 1.255237  |
| C             | -0.342397 | -1.336815 | 0.000000          | C  | -0.336623 | -1.302501 | 0.000000  |
| C             | 1.206684  | -1.203973 | 0.000000          | C  | 1.210102  | -1.179858 | 0.000000  |
| C             | 1.442145  | -2.729862 | 0.000000          | C  | 1.430394  | -2.703717 | 0.000000  |
| C             | 0.657733  | -3.163732 | -1.252349         | C  | 0.646280  | -3.128858 | -1.248710 |
| C             | 0.657733  | -3.163732 | 1.252349          | C  | 0.646280  | -3.128858 | 1.248710  |
| C             | -0.571776 | -2.211691 | -1.256982         | C  | -0.568550 | -2.167176 | -1.255237 |
| Co            | 0.039770  | 1.252195  | 0.000000          | Co | 0.032436  | 1.260523  | 0.000000  |
| H             | 1.613947  | -0.725565 | 0.900102          | H  | 1.620553  | -0.707817 | 0.895311  |
| H             | 1.613947  | -0.725565 | -0.900102         | H  | 1.620553  | -0.707817 | -0.895311 |
| H             | -0.593797 | -1.591923 | -2.161199         | H  | -0.576871 | -1.539002 | -2.147650 |
| H             | -1.532267 | -2.732539 | -1.194592         | H  | -1.533218 | -2.669349 | -1.201323 |
| H             | -1.532267 | -2.732539 | 1.194592          | H  | -1.533218 | -2.669349 | 1.201323  |
| H             | -0.593797 | -1.591923 | 2.161199          | H  | -0.576871 | -1.539002 | 2.147650  |
| H             | 0.367791  | -4.219668 | -1.204599         | H  | 0.347370  | -4.176832 | -1.202186 |
| H             | 1.261684  | -3.027921 | -2.157259         | H  | 1.251062  | -3.000231 | -2.147726 |
| H             | 2.491071  | -3.043863 | 0.000000          | H  | 2.471130  | -3.024913 | 0.000000  |
| H             | 1.261684  | -3.027921 | 2.157259          | H  | 1.251062  | -3.000231 | 2.147726  |
| H             | 0.367791  | -4.219668 | 1.204599          | H  | 0.347370  | -4.176832 | 1.202186  |
| C             | 1.592185  | 2.194844  | 0.000000          | C  | 1.596969  | 2.180841  | 0.000000  |
| C             | -1.268461 | -0.110407 | 0.000000          | C  | -1.273550 | -0.091772 | 0.000000  |
| O             | 2.560304  | 2.819200  | 0.000000          | O  | 2.567545  | 2.774708  | 0.000000  |
| O             | -2.468585 | -0.195802 | 0.000000          | O  | -2.460551 | -0.195403 | 0.000000  |
| C             | -0.571776 | 1.761763  | -1.574322         | C  | -0.568550 | 1.730331  | -1.592084 |
| O             | -1.030278 | 2.207740  | -2.537108         | O  | -1.018410 | 2.119580  | -2.566368 |
| C             | -0.571776 | 1.761763  | 1.574322          | C  | -0.568550 | 1.730331  | 1.592084  |
| O             | -1.030278 | 2.207740  | 2.537108          | O  | -1.018410 | 2.119580  | 2.566368  |

**Table S3.** Optimized coordinates for the (nor)Co(CO)<sub>3</sub> structure **3S-1**.

| B3PW91-D3/DZP |           |           | B3PW91-D3/cc-pVTZ |    |           |           |           |
|---------------|-----------|-----------|-------------------|----|-----------|-----------|-----------|
| x             | y         | z         | x                 | y  | z         |           |           |
| C             | -1.214674 | 1.664353  | -0.428036         | C  | -1.187883 | 1.673389  | -0.431298 |
| Co            | -1.027582 | -0.014054 | 0.077703          | Co | -1.050496 | -0.013220 | 0.071213  |
| C             | 0.902383  | 0.083877  | -0.179877         | C  | 0.883997  | 0.065299  | -0.151517 |
| C             | 1.752157  | 1.258661  | -0.674689         | C  | 1.711520  | 1.222583  | -0.707931 |
| C             | 3.205553  | 0.779077  | -0.351796         | C  | 3.173777  | 0.765688  | -0.427905 |
| C             | 3.000513  | -0.653073 | 0.193360          | C  | 2.995444  | -0.631951 | 0.191558  |
| C             | 1.771310  | -1.114824 | -0.604605         | C  | 1.751448  | -1.139219 | -0.542874 |
| C             | 2.399749  | -0.587391 | 1.611328          | C  | 2.442504  | -0.492730 | 1.617110  |
| C             | 0.988276  | 0.045969  | 1.365846          | C  | 1.005972  | 0.080190  | 1.388731  |
| C             | -1.131506 | -1.441955 | -0.950533         | C  | -1.095075 | -1.501404 | -0.871530 |
| H             | 1.619499  | 1.413123  | -1.751973         | H  | 1.530570  | 1.343778  | -1.776826 |
| H             | 1.499791  | 2.200059  | -0.173106         | H  | 1.467798  | 2.170979  | -0.227694 |
| H             | 3.826171  | 0.763144  | -1.255494         | H  | 3.752473  | 0.706414  | -1.351074 |
| H             | 3.706927  | 1.426630  | 0.377924          | H  | 3.701510  | 1.445213  | 0.243835  |
| H             | 2.992185  | 0.024751  | 2.301701          | H  | 3.040306  | 0.173357  | 2.241168  |
| H             | 2.316243  | -1.592442 | 2.041515          | H  | 2.403551  | -1.465143 | 2.110601  |
| H             | 0.909674  | 1.045166  | 1.803817          | H  | 0.897167  | 1.084625  | 1.794454  |
| H             | 0.197760  | -0.586156 | 1.831553          | H  | 0.260528  | -0.563781 | 1.889932  |
| H             | 1.388433  | -2.084839 | -0.265831         | H  | 1.384441  | -2.087577 | -0.147012 |
| H             | 1.939134  | -1.154251 | -1.687620         | H  | 1.881021  | -1.232475 | -1.622389 |
| H             | 3.894324  | -1.283356 | 0.125287          | H  | 3.886567  | -1.256679 | 0.129738  |
| O             | -1.269181 | -2.278070 | -1.738656         | O  | -1.167566 | -2.377749 | -1.600945 |
| O             | -1.403667 | 2.705433  | -0.896686         | O  | -1.322749 | 2.709530  | -0.892948 |
| C             | -2.637679 | -0.180961 | 0.840317          | C  | -2.690754 | -0.152191 | 0.767855  |
| O             | -3.672391 | -0.291709 | 1.338636          | O  | -3.733213 | -0.244243 | 1.218808  |

**Table S4.** Optimized coordinates for the (nor)Co(CO)<sub>3</sub> structure **3S-2**.

| B3PW91-D3/DZP |           |           | B3PW91-D3/cc-pVTZ |    |           |           |           |
|---------------|-----------|-----------|-------------------|----|-----------|-----------|-----------|
| x             | y         | z         | x                 | y  | z         |           |           |
| C             | 0.274608  | 1.938260  | 1.258475          | C  | 0.274709  | 1.896923  | 1.256019  |
| C             | 0.113775  | 1.051797  | 0.000000          | C  | 0.096083  | 1.021321  | 0.000000  |
| C             | -1.423787 | 0.800479  | 0.000000          | C  | -1.442297 | 0.803735  | 0.000000  |
| C             | -1.769272 | 2.307688  | 0.000000          | C  | -1.749701 | 2.315160  | 0.000000  |
| C             | -1.021227 | 2.798644  | -1.253178         | C  | -0.994243 | 2.786513  | -1.249301 |
| C             | -1.021227 | 2.798644  | 1.253178          | C  | -0.994243 | 2.786513  | 1.249301  |
| C             | 0.274608  | 1.938260  | -1.258475         | C  | 0.274709  | 1.896923  | -1.256019 |
| Co            | -0.143544 | -1.358087 | 0.000000          | Co | -0.153791 | -1.380964 | 0.000000  |
| H             | -1.798408 | 0.301005  | 0.904910          | H  | -1.829703 | 0.318188  | 0.900475  |
| H             | -1.798408 | 0.301005  | -0.904910         | H  | -1.829703 | 0.318188  | -0.900475 |
| H             | 0.341438  | 1.318686  | -2.159749         | H  | 0.320037  | 1.268166  | -2.145974 |
| H             | 1.193649  | 2.529639  | -1.196691         | H  | 1.207505  | 2.456340  | -1.201159 |
| H             | 1.193649  | 2.529639  | 1.196691          | H  | 1.207505  | 2.456340  | 1.201159  |
| H             | 0.341438  | 1.318686  | 2.159749          | H  | 0.320037  | 1.268166  | 2.145974  |
| H             | -0.811956 | 3.873380  | -1.206112         | H  | -0.760061 | 3.850755  | -1.203616 |
| H             | -1.613758 | 2.617704  | -2.157663         | H  | -1.590373 | 2.621145  | -2.148034 |
| H             | -2.839662 | 2.537511  | 0.000000          | H  | -2.808795 | 2.569079  | 0.000000  |
| H             | -1.613758 | 2.617704  | 2.157663          | H  | -1.590373 | 2.621145  | 2.148034  |
| H             | -0.811956 | 3.873380  | 1.206112          | H  | -0.760061 | 3.850755  | 1.203616  |
| C             | 1.126802  | -0.118630 | 0.000000          | C  | 1.107547  | -0.143057 | 0.000000  |
| O             | 2.321809  | -0.025095 | 0.000000          | O  | 2.289581  | -0.037212 | 0.000000  |
| C             | 0.274608  | -2.103605 | -1.539260         | C  | 0.274709  | -2.077751 | -1.561532 |
| O             | 0.681125  | -2.674801 | -2.463073         | O  | 0.701114  | -2.579107 | -2.498722 |
| C             | 0.274608  | -2.103605 | 1.539260          | C  | 0.274709  | -2.077751 | 1.561532  |
| O             | 0.681125  | -2.674801 | 2.463073          | O  | 0.701114  | -2.579107 | 2.498722  |

**Table S5.** Optimized coordinates for the (nor)Co(CO)<sub>3</sub> structure **3T-3**.

| B3PW91-D3/DZP |           |           | B3PW91-D3/cc-pVTZ |    |           |           |           |
|---------------|-----------|-----------|-------------------|----|-----------|-----------|-----------|
| x             | y         | z         | x                 | y  | z         |           |           |
| C             | -1.511762 | 0.205980  | 1.688597          | C  | -1.449426 | 0.186125  | 1.705755  |
| Co            | -1.073728 | -0.134990 | -0.082520         | Co | -1.090392 | -0.135313 | -0.087902 |
| C             | 0.913116  | -0.052943 | 0.028265          | C  | 0.889131  | -0.082055 | 0.016787  |
| C             | 1.672886  | 1.118199  | 0.680829          | C  | 1.642558  | 1.061222  | 0.708509  |
| C             | 3.130124  | 0.973969  | 0.134754          | C  | 3.094743  | 0.938573  | 0.158980  |
| C             | 3.036085  | -0.266079 | -0.774012         | C  | 3.000975  | -0.265062 | -0.789599 |
| C             | 1.611969  | -0.120857 | -1.353264         | C  | 1.581203  | -0.098656 | -1.360973 |
| C             | 2.881901  | -1.513157 | 0.114770          | C  | 2.846419  | -1.538787 | 0.051919  |
| C             | 1.431683  | -1.363202 | 0.682076          | C  | 1.398469  | -1.411433 | 0.617929  |
| C             | -1.430309 | 1.540416  | -0.793058         | C  | -1.359437 | 1.573718  | -0.760630 |
| H             | 1.248241  | 2.085732  | 0.384965          | H  | 1.211191  | 2.028863  | 0.444275  |
| H             | 1.628940  | 1.071145  | 1.776233          | H  | 1.591526  | 0.976422  | 1.795702  |
| H             | 3.425568  | 1.859864  | -0.441474         | H  | 3.387257  | 1.839574  | -0.384282 |
| H             | 3.871563  | 0.840127  | 0.932065          | H  | 3.833755  | 0.779549  | 0.946540  |
| H             | 3.639906  | -1.550423 | 0.906847          | H  | 3.599079  | -1.603798 | 0.839896  |
| H             | 2.979285  | -2.431455 | -0.477892         | H  | 2.946294  | -2.430689 | -0.570145 |
| H             | 1.413568  | -1.300068 | 1.777136          | H  | 1.368762  | -1.392047 | 1.708680  |
| H             | 0.826508  | -2.237613 | 0.402537          | H  | 0.790748  | -2.262936 | 0.298388  |
| H             | 1.314826  | -0.985393 | -1.962820         | H  | 1.275786  | -0.935097 | -1.994873 |
| H             | 1.487974  | 0.792313  | -1.950040         | H  | 1.449643  | 0.831660  | -1.918243 |
| H             | 3.846066  | -0.342902 | -1.509021         | H  | 3.808296  | -0.316077 | -1.521102 |
| O             | -1.492041 | 2.598737  | -1.242972         | O  | -1.328133 | 2.631355  | -1.177063 |
| O             | -1.637791 | 0.424823  | 2.812064          | O  | -1.491882 | 0.387603  | 2.823856  |
| C             | -2.497721 | -1.173092 | -0.688178         | C  | -2.562533 | -1.109593 | -0.688849 |
| O             | -3.385122 | -1.805062 | -1.060990         | O  | -3.469282 | -1.692244 | -1.050599 |

**Table S6.** Optimized coordinates for the (nor)Co(CO)<sub>2</sub> structure **2S-1**.

| B3PW91-D3/DZP |           |           | B3PW91-D3/cc-pVTZ |    |           |           |           |
|---------------|-----------|-----------|-------------------|----|-----------|-----------|-----------|
| x             | y         | z         | x                 | y  | z         |           |           |
| Co            | 1.065690  | -0.150794 | -0.058589         | Co | 1.066714  | -0.155647 | -0.056958 |
| C             | -0.763545 | 0.314978  | -0.084736         | C  | -0.755737 | 0.303606  | -0.092356 |
| C             | -1.731107 | 1.188969  | -0.871201         | C  | -1.720185 | 1.178500  | -0.867261 |
| C             | -3.114188 | 0.601799  | -0.411314         | C  | -3.097149 | 0.592169  | -0.403236 |
| C             | -2.739198 | -0.427635 | 0.686639          | C  | -2.717882 | -0.435604 | 0.688242  |
| C             | -1.470822 | 0.207822  | 1.282207          | C  | -1.449784 | 0.195459  | 1.274788  |
| C             | -2.130857 | -1.689827 | 0.039124          | C  | -2.117307 | -1.692799 | 0.037241  |
| C             | -0.837099 | -1.120216 | -0.626172         | C  | -0.830002 | -1.124950 | -0.631998 |
| C             | 1.584779  | 1.463305  | 0.104126          | C  | 1.544880  | 1.470721  | 0.103097  |
| H             | -1.638031 | 2.244224  | -0.589586         | H  | -1.619615 | 2.226599  | -0.582222 |
| H             | -1.581144 | 1.118928  | -1.954337         | H  | -1.572300 | 1.111979  | -1.945287 |
| H             | -3.756707 | 1.387167  | 0.003621          | H  | -3.736259 | 1.371851  | 0.013359  |
| H             | -3.663470 | 0.134837  | -1.238085         | H  | -3.646414 | 0.127417  | -1.224216 |
| H             | -2.782868 | -2.150841 | -0.711930         | H  | -2.771899 | -2.148869 | -0.706538 |
| H             | -1.906727 | -2.447978 | 0.799144          | H  | -1.890313 | -2.448679 | 0.790959  |
| H             | -0.866444 | -1.157342 | -1.719303         | H  | -0.863577 | -1.163532 | -1.719714 |
| H             | 0.061777  | -1.750930 | -0.325092         | H  | 0.068497  | -1.752155 | -0.334404 |
| H             | -0.964760 | -0.442671 | 2.007581          | H  | -0.936870 | -0.453704 | 1.988431  |
| H             | -1.636347 | 1.189507  | 1.740596          | H  | -1.604459 | 1.172366  | 1.733997  |
| H             | -3.556264 | -0.644052 | 1.384707          | H  | -3.527682 | -0.651147 | 1.386092  |
| O             | 1.916145  | 2.571420  | 0.202798          | O  | 1.823911  | 2.578672  | 0.199372  |
| C             | 2.639302  | -0.958301 | -0.028135         | C  | 2.653449  | -0.939648 | -0.023285 |
| O             | 3.695577  | -1.433267 | 0.002371          | O  | 3.705829  | -1.387967 | 0.003879  |

**Table S7.** Optimized coordinates for the (nor)Co(CO)<sub>2</sub> structure **2T-2**.

| B3PW91-D3/DZP |           |           | B3PW91-D3/cc-pVTZ |    |           |           |           |
|---------------|-----------|-----------|-------------------|----|-----------|-----------|-----------|
| x             | y         | z         | x                 | y  | z         |           |           |
| Co            | -1.243889 | -0.142410 | 0.003488          | Co | -1.255566 | -0.149058 | 0.005805  |
| C             | 0.735777  | -0.141221 | 0.044996          | C  | 0.718043  | -0.171277 | 0.051282  |
| C             | 1.377987  | 0.431301  | 1.336008          | C  | 1.355865  | 0.465415  | 1.304781  |
| C             | 2.878963  | 0.652801  | 0.954173          | C  | 2.850564  | 0.670767  | 0.910571  |
| C             | 2.936048  | 0.173326  | -0.506937         | C  | 2.904580  | 0.122284  | -0.520803 |
| C             | 1.552943  | 0.611711  | -1.030329         | C  | 1.523294  | 0.530405  | -1.058409 |
| C             | 2.800997  | -1.359186 | -0.520698         | C  | 2.773417  | -1.404682 | -0.461358 |
| C             | 1.301194  | -1.581621 | -0.132320         | C  | 1.279139  | -1.610929 | -0.062080 |
| C             | -1.653555 | 1.660503  | -0.191035         | C  | -1.541951 | 1.679213  | -0.193199 |
| H             | 0.918946  | 1.386041  | 1.627362          | H  | 0.889674  | 1.426053  | 1.539303  |
| H             | 1.263267  | -0.251711 | 2.188052          | H  | 1.237999  | -0.168976 | 2.186083  |
| H             | 3.152380  | 1.713016  | 1.030028          | H  | 3.120417  | 1.728902  | 0.932525  |
| H             | 3.566569  | 0.090016  | 1.597806          | H  | 3.538137  | 0.145446  | 1.576442  |
| H             | 3.493522  | -1.839841 | 0.181617          | H  | 3.465358  | -1.848172 | 0.257492  |
| H             | 3.012566  | -1.762942 | -1.519103         | H  | 2.984165  | -1.852046 | -1.435269 |
| H             | 1.192170  | -2.177551 | 0.783052          | H  | 1.165772  | -2.162561 | 0.873448  |
| H             | 0.785110  | -2.130107 | -0.932995         | H  | 0.757522  | -2.184197 | -0.833282 |
| H             | 1.358976  | 0.264016  | -2.054838         | H  | 1.320843  | 0.134605  | -2.057602 |
| H             | 1.414199  | 1.700919  | -0.998151         | H  | 1.375021  | 1.613255  | -1.076403 |
| H             | 3.803702  | 0.547253  | -1.063629         | H  | 3.766066  | 0.468413  | -1.093341 |
| O             | -1.712525 | 2.804422  | -0.319286         | O  | -1.477765 | 2.808735  | -0.315557 |
| C             | -2.876411 | -1.016935 | 0.095873          | C  | -2.926679 | -0.950193 | 0.085903  |
| O             | -3.874984 | -1.589189 | 0.165316          | O  | -3.939524 | -1.466507 | 0.144774  |



**Table S8.** Optimized coordinates for the (nor)Co(CO)<sub>2</sub> structure **2T-3**.

| B3PW91-D3/DZP |           |           | B3PW91-D3/cc-pVTZ |    |           |           |           |
|---------------|-----------|-----------|-------------------|----|-----------|-----------|-----------|
| x             | y         | z         | x                 | y  | z         |           |           |
| C             | -2.116257 | 1.355136  | -0.443452         | C  | -2.123313 | 1.350777  | -0.439444 |
| C             | -1.221849 | 0.138799  | -0.131192         | C  | -1.214910 | 0.150274  | -0.135637 |
| C             | -1.770161 | -0.313856 | 1.248045          | C  | -1.747695 | -0.310718 | 1.241164  |
| C             | -3.219578 | -0.451386 | 0.752091          | C  | -3.191870 | -0.468697 | 0.751521  |
| C             | -3.050988 | -1.440930 | -0.416143         | C  | -3.013758 | -1.449689 | -0.415748 |
| C             | -3.486727 | 0.954517  | 0.178268          | C  | -3.481297 | 0.929794  | 0.184304  |
| C             | -1.666835 | -1.050275 | -1.014865         | C  | -1.641620 | -1.039532 | -1.016276 |
| Co            | 2.085855  | -0.166036 | 0.024490          | Co | 2.068784  | -0.169122 | 0.021257  |
| H             | -1.644436 | 0.449947  | 2.025391          | H  | -1.626722 | 0.451487  | 2.013375  |
| H             | -1.329343 | -1.257462 | 1.591133          | H  | -1.288971 | -1.241824 | 1.578264  |
| H             | -0.945842 | -1.873259 | -0.934320         | H  | -0.907927 | -1.844415 | -0.935014 |
| H             | -1.723967 | -0.762569 | -2.070994         | H  | -1.701105 | -0.753113 | -2.067003 |
| H             | -2.175274 | 1.543056  | -1.521347         | H  | -2.185269 | 1.541992  | -1.511154 |
| H             | -1.706026 | 2.258939  | 0.019781          | H  | -1.721277 | 2.251702  | 0.024564  |
| H             | -3.863365 | -1.353938 | -1.147240         | H  | -3.826277 | -1.373740 | -1.139952 |
| H             | -3.043515 | -2.476395 | -0.054809         | H  | -2.991413 | -2.480746 | -0.058450 |
| H             | -3.948448 | -0.771398 | 1.505042          | H  | -3.910693 | -0.799676 | 1.501163  |
| H             | -3.773005 | 1.650461  | 0.976364          | H  | -3.773794 | 1.615640  | 0.981650  |
| H             | -4.300492 | 0.948146  | -0.556688         | H  | -4.294455 | 0.913593  | -0.543228 |
| C             | 3.880825  | -0.188448 | 0.097642          | C  | 3.868183  | -0.196358 | 0.099415  |
| C             | 0.258568  | 0.348236  | -0.134033         | C  | 0.254510  | 0.378466  | -0.138676 |
| O             | 5.036110  | -0.223802 | 0.148904          | O  | 5.008702  | -0.224213 | 0.151645  |
| O             | 0.775595  | 1.475886  | -0.312868         | O  | 0.756467  | 1.501650  | -0.301883 |

**Table S9.** Optimized coordinates for the (nor)Co(CO)<sub>2</sub> structure **2S-4**.

| B3PW91-D3/DZP |           |           | B3PW91-D3/cc-pVTZ |    |           |           |           |
|---------------|-----------|-----------|-------------------|----|-----------|-----------|-----------|
| x             | y         | z         | x                 | y  | z         |           |           |
| C             | 1.593289  | 0.618701  | 1.258443          | C  | 1.552740  | 0.635787  | 1.255030  |
| C             | 0.777840  | 0.251000  | 0.000000          | C  | 0.744917  | 0.270105  | 0.000000  |
| C             | -0.295362 | 1.413021  | 0.000000          | C  | -0.330460 | 1.424798  | 0.000000  |
| C             | 0.773078  | 2.528142  | 0.000000          | C  | 0.735769  | 2.537079  | 0.000000  |
| C             | 1.593289  | 2.174602  | -1.254348         | C  | 1.552740  | 2.186567  | -1.250257 |
| C             | 1.593289  | 2.174602  | 1.254348          | C  | 1.552740  | 2.186567  | 1.250257  |
| C             | 1.593289  | 0.618701  | -1.258443         | C  | 1.552740  | 0.635787  | -1.255030 |
| Co            | -1.238645 | -0.578814 | 0.000000          | Co | -1.203801 | -0.605362 | 0.000000  |
| H             | -0.925292 | 1.460841  | 0.909897          | H  | -0.957408 | 1.474962  | 0.904983  |
| H             | -0.925292 | 1.460841  | -0.909897         | H  | -0.957408 | 1.474962  | -0.904983 |
| H             | 1.116877  | 0.218566  | -2.160174         | H  | 1.066957  | 0.236974  | -2.145775 |
| H             | 2.595430  | 0.182293  | -1.196833         | H  | 2.547530  | 0.195520  | -1.200137 |
| H             | 2.595430  | 0.182293  | 1.196833          | H  | 2.547530  | 0.195520  | 1.200137  |
| H             | 1.116877  | 0.218566  | 2.160174          | H  | 1.066957  | 0.236974  | 2.145775  |
| H             | 2.603327  | 2.596407  | -1.204373         | H  | 2.557467  | 2.607739  | -1.202461 |
| H             | 1.115823  | 2.570573  | -2.158452         | H  | 1.075648  | 2.581094  | -2.148822 |
| H             | 0.371145  | 3.546741  | 0.000000          | H  | 0.334901  | 3.550047  | 0.000000  |
| H             | 1.115823  | 2.570573  | 2.158452          | H  | 1.075648  | 2.581094  | 2.148822  |
| H             | 2.603327  | 2.596407  | 1.204373          | H  | 2.557467  | 2.607739  | 1.202461  |
| C             | -2.236278 | -1.953063 | 0.000000          | C  | -2.215681 | -1.974225 | 0.000000  |
| C             | 0.334007  | -1.269902 | 0.000000          | C  | 0.359580  | -1.286141 | 0.000000  |
| O             | -2.850975 | -2.941182 | 0.000000          | O  | -2.815630 | -2.954738 | 0.000000  |
| O             | 1.063636  | -2.222686 | 0.000000          | O  | 1.135234  | -2.182237 | 0.000000  |

**Table S10.** Optimized coordinates for the (nor)Co(CO)<sub>2</sub> structure **1T-1**.

| B3PW91-D3/DZP |           |           | B3PW91-D3/cc-pVTZ |    |           |           |           |
|---------------|-----------|-----------|-------------------|----|-----------|-----------|-----------|
| x             | y         | z         | x                 | y  | z         |           |           |
| Co            | 0.465233  | 1.370164  | 0.000000          | Co | 0.461284  | 1.366957  | 0.000000  |
| C             | -0.251957 | -0.453975 | 0.000000          | C  | -0.253482 | -0.456652 | 0.000000  |
| C             | -1.098465 | -0.843904 | 1.244669          | C  | -1.092967 | -0.843285 | 1.241820  |
| C             | -1.098465 | -2.407872 | 1.247743          | C  | -1.092967 | -2.402230 | 1.244144  |
| C             | -0.267237 | -2.752674 | 0.000000          | C  | -0.264916 | -2.744958 | 0.000000  |
| C             | 0.777596  | -1.617182 | 0.000000          | C  | 0.775246  | -1.612059 | 0.000000  |
| C             | -1.098465 | -2.407872 | -1.247743         | C  | -1.092967 | -2.402230 | -1.244144 |
| C             | -1.098465 | -0.843904 | -1.244669         | C  | -1.092967 | -0.843285 | -1.241820 |
| H             | -0.651046 | -0.467222 | 2.175944          | H  | -0.638356 | -0.463326 | 2.161522  |
| H             | -2.113564 | -0.428698 | 1.190963          | H  | -2.100397 | -0.423918 | 1.192122  |
| H             | -0.624296 | -2.801668 | 2.156053          | H  | -0.619999 | -2.795335 | 2.147011  |
| H             | -2.109544 | -2.831178 | 1.196581          | H  | -2.098924 | -2.824202 | 1.194566  |
| H             | -2.109544 | -2.831178 | -1.196581         | H  | -2.098924 | -2.824202 | -1.194566 |
| H             | -0.624296 | -2.801668 | -2.156053         | H  | -0.619999 | -2.795335 | -2.147011 |
| H             | -2.113564 | -0.428698 | -1.190963         | H  | -2.100397 | -0.423918 | -1.192122 |
| H             | -0.651046 | -0.467222 | -2.175944         | H  | -0.638356 | -0.463326 | -2.161522 |
| H             | 1.419262  | -1.636601 | -0.892389         | H  | 1.414112  | -1.623360 | -0.887698 |
| H             | 1.419262  | -1.636601 | 0.892389          | H  | 1.414112  | -1.623360 | 0.887698  |
| H             | 0.131216  | -3.774565 | 0.000000          | H  | 0.130847  | -3.761634 | 0.000000  |
| C             | 1.179765  | 3.044585  | 0.000000          | C  | 1.176769  | 3.042863  | 0.000000  |
| O             | 1.650003  | 4.100958  | 0.000000          | O  | 1.641389  | 4.085639  | 0.000000  |

**Table S11.** Optimized coordinates for the (nor)<sub>2</sub>Co(CO)<sub>7</sub> structure **7S-b1**.

| B3PW91-D3/DZP |           |           | B3PW91-D3/cc-pVTZ |    |           |           |           |
|---------------|-----------|-----------|-------------------|----|-----------|-----------|-----------|
| x             | y         | z         | x                 | y  | z         |           |           |
| Co            | 2.022311  | -0.990391 | -0.141673         | Co | -0.731528 | -1.123535 | 0.334380  |
| C             | 1.332112  | 1.861531  | -0.184247         | C  | -3.393636 | 0.388005  | -0.121861 |
| C             | 2.044175  | 2.613468  | -1.339911         | C  | -4.122572 | -0.960781 | -0.192733 |
| C             | 2.869567  | 3.697124  | -0.588267         | C  | -5.326105 | -0.666564 | -1.127082 |
| C             | 2.482693  | 3.479038  | 0.886554          | C  | -5.160371 | 0.822935  | -1.456950 |
| C             | 2.371102  | 1.946872  | 0.947030          | C  | -3.637519 | 0.949767  | -1.547830 |
| C             | 1.013763  | 3.906894  | 1.074314          | C  | -5.468273 | 1.642763  | -0.196659 |
| C             | 0.215600  | 2.784215  | 0.352679          | C  | -4.251710 | 1.356033  | 0.723184  |
| H             | 2.695070  | 1.944977  | -1.911292         | H  | -3.475089 | -1.731322 | -0.609902 |
| H             | 1.310504  | 3.028520  | -2.038583         | H  | -4.428188 | -1.300935 | 0.796395  |
| H             | 3.943940  | 3.535271  | -0.734719         | H  | -5.268914 | -1.271397 | -2.033612 |
| H             | 2.636982  | 4.712444  | -0.929368         | H  | -6.286509 | -0.877158 | -0.654704 |
| H             | 0.822248  | 4.899697  | 0.650652          | H  | -6.416447 | 1.351368  | 0.257456  |
| H             | 0.750714  | 3.943577  | 2.137545          | H  | -5.532295 | 2.706484  | -0.431553 |
| H             | -0.420558 | 3.147414  | -0.460704         | H  | -4.530497 | 0.900522  | 1.673993  |
| H             | -0.413490 | 2.242842  | 1.061232          | H  | -3.690521 | 2.263741  | 0.938680  |
| H             | 1.983226  | 1.563860  | 1.898708          | H  | -3.277280 | 1.974015  | -1.647087 |
| H             | 3.312600  | 1.435644  | 0.711896          | H  | -3.192549 | 0.331704  | -2.328325 |
| H             | 3.175660  | 3.936686  | 1.599501          | H  | -5.711522 | 1.143353  | -2.340866 |
| C             | 0.855184  | 0.500342  | -0.623120         | C  | -1.932612 | 0.402637  | 0.229812  |
| C             | 3.070390  | -2.078190 | 0.848840          | C  | 0.589890  | -2.337799 | 0.407214  |
| O             | -0.164477 | 0.370753  | -1.339673         | O  | -1.416697 | 1.510915  | 0.425138  |
| O             | 3.800765  | -2.742350 | 1.442226          | O  | 1.437849  | -3.097490 | 0.441358  |
| C             | -4.168584 | -0.547367 | 0.774128          | C  | 3.802023  | -0.226761 | 0.829150  |
| C             | -3.014895 | 0.344719  | 0.230092          | C  | 3.334194  | 0.148667  | -0.579725 |
| C             | -3.160548 | 0.168172  | -1.289018         | C  | 4.366416  | 1.235749  | -0.968310 |
| C             | -4.636071 | 0.596205  | -1.312851         | C  | 5.570686  | 0.317949  | -0.733580 |
| C             | -4.569678 | 1.985099  | -0.646302         | C  | 5.246791  | -0.859982 | -1.663682 |
| C             | -5.264274 | -0.397200 | -0.318408         | C  | 5.346872  | -0.125939 | 0.720330  |
| C             | -3.447784 | 1.818488  | 0.417165          | C  | 3.702971  | -0.984352 | -1.559575 |
| H             | -3.005628 | -0.860889 | -1.630655         | H  | 4.333998  | 2.100695  | -0.303688 |
| H             | -2.497123 | 0.828544  | -1.853378         | H  | 4.248891  | 1.565386  | -2.001097 |
| H             | -2.606873 | 2.488118  | 0.214785          | H  | 3.217027  | -0.819766 | -2.520990 |
| H             | -3.778586 | 2.006727  | 1.442850          | H  | 3.375457  | -1.951282 | -1.179100 |
| H             | -4.482125 | -0.200482 | 1.763930          | H  | 3.454176  | -1.216989 | 1.120737  |
| H             | -3.855127 | -1.591009 | 0.880871          | H  | 3.407137  | 0.481553  | 1.556908  |
| H             | -5.530425 | 2.274044  | -0.204068         | H  | 5.761496  | -1.772610 | -1.360437 |
| H             | -4.299473 | 2.753589  | -1.380030         | H  | 5.548703  | -0.639027 | -2.688760 |

---

|    |           |           |           |    |           |           |           |
|----|-----------|-----------|-----------|----|-----------|-----------|-----------|
| H  | -5.114977 | 0.598630  | -2.297389 | H  | 6.546300  | 0.768752  | -0.913465 |
| H  | -5.459684 | -1.359692 | -0.805518 | H  | 5.737581  | 0.616094  | 1.418233  |
| H  | -6.213700 | -0.031592 | 0.089748  | H  | 5.845784  | -1.071145 | 0.937760  |
| C  | 1.017774  | -2.196490 | -1.098718 | C  | -1.727431 | -1.811381 | 1.642456  |
| C  | -1.736699 | 0.007674  | 0.981469  | C  | 1.936021  | 0.632738  | -0.713345 |
| O  | 1.035749  | -3.052820 | -1.887007 | O  | -2.370181 | -2.262684 | 2.470170  |
| O  | -1.571331 | 0.407334  | 2.111173  | O  | 1.361352  | 0.869310  | -1.755601 |
| C  | 0.418536  | -1.460615 | 1.666597  | C  | 0.688928  | 0.026043  | 1.713971  |
| O  | 0.635078  | -1.793387 | 2.754007  | O  | 1.068080  | -0.280087 | 2.764245  |
| O  | 4.109404  | -0.275894 | -2.023212 | O  | -1.150691 | -1.505521 | -2.522923 |
| C  | 3.268204  | -0.493258 | -1.259714 | C  | -0.985996 | -1.346069 | -1.404080 |
| C  | -1.520432 | -2.357352 | -0.136511 | C  | 1.308966  | 2.598049  | 0.870045  |
| O  | -2.193108 | -3.285588 | -0.262285 | O  | 1.900749  | 3.469759  | 1.310424  |
| Co | -0.348631 | -1.061369 | 0.109872  | Co | 0.522801  | 1.108872  | 0.333265  |

---

**Table S12.** Optimized coordinates for the (nor)<sub>2</sub>Co(CO)<sub>7</sub> structure **7S-b2**.

| B3PW91-D3/DZP |           |           | B3PW91-D3/cc-pVTZ |    |           |           |           |
|---------------|-----------|-----------|-------------------|----|-----------|-----------|-----------|
| x             | y         | z         | x                 | y  | z         |           |           |
| C             | -1.873861 | 2.096691  | -1.178428         | C  | -1.921509 | 2.076195  | -1.182132 |
| C             | -2.199987 | 1.063679  | -0.071523         | C  | -2.218994 | 1.044983  | -0.072038 |
| C             | -1.585245 | 1.740401  | 1.165042          | C  | -1.611568 | 1.741885  | 1.151507  |
| C             | -2.356843 | 3.057977  | 0.992579          | C  | -2.414128 | 3.036561  | 0.979402  |
| C             | -3.815834 | 2.567477  | 0.967707          | C  | -3.855564 | 2.513060  | 0.971646  |
| C             | -1.947509 | 3.462905  | -0.433841         | C  | -2.031425 | 3.441084  | -0.448654 |
| C             | -3.714472 | 1.200686  | 0.225494          | C  | -3.730318 | 1.152061  | 0.232761  |
| Co            | -1.571422 | -0.918406 | -0.412950         | Co | -1.564732 | -0.928505 | -0.412216 |
| H             | -0.505540 | 1.871486  | 1.079547          | H  | -0.540940 | 1.897853  | 1.055189  |
| H             | -1.809707 | 1.231351  | 2.108893          | H  | -1.813010 | 1.235777  | 2.095875  |
| H             | -4.081468 | 0.388280  | 0.860457          | H  | -4.076085 | 0.336740  | 0.866745  |
| H             | -4.309824 | 1.178095  | -0.693903         | H  | -4.325813 | 1.114261  | -0.679989 |
| H             | -2.587713 | 2.035022  | -2.006927         | H  | -2.627317 | 1.989300  | -2.008398 |
| H             | -0.881797 | 1.943526  | -1.605884         | H  | -0.928801 | 1.948636  | -1.603457 |
| H             | -4.479938 | 3.276853  | 0.460028          | H  | -4.540586 | 3.202039  | 0.474851  |
| H             | -4.196113 | 2.429105  | 1.986989          | H  | -4.219459 | 2.367757  | 1.990557  |
| H             | -2.157484 | 3.825649  | 1.748245          | H  | -2.227632 | 3.810158  | 1.724247  |
| H             | -0.966809 | 3.954780  | -0.428285         | H  | -1.072055 | 3.962219  | -0.457245 |
| H             | -2.664174 | 4.155523  | -0.890388         | H  | -2.769696 | 4.104646  | -0.901639 |
| C             | -2.186079 | -1.220481 | 1.263198          | C  | -2.147892 | -1.231509 | 1.276833  |
| C             | -2.617298 | -0.653955 | -1.789586         | C  | -2.613022 | -0.694026 | -1.795229 |
| O             | -2.628887 | -1.412956 | 2.309239          | O  | -2.561611 | -1.420314 | 2.320370  |
| O             | -3.334754 | -0.508170 | -2.681412         | O  | -3.318749 | -0.563949 | -2.680940 |
| C             | 1.948335  | 2.008312  | -0.014404         | C  | 1.946204  | 2.020570  | -0.014919 |
| C             | 2.534372  | 0.579664  | -0.024997         | C  | 2.535760  | 0.598063  | -0.022081 |
| C             | 3.302136  | 0.586258  | -1.367202         | C  | 3.307029  | 0.607487  | -1.357375 |
| C             | 4.137718  | 1.830165  | -1.025125         | C  | 4.132964  | 1.852551  | -1.015077 |
| C             | 4.809234  | 1.399863  | 0.292777          | C  | 4.798021  | 1.429806  | 0.302420  |
| C             | 3.043125  | 2.864932  | -0.713926         | C  | 3.036111  | 2.878633  | -0.711155 |
| C             | 3.708769  | 0.534108  | 0.978157          | C  | 3.703938  | 0.558348  | 0.981108  |
| Co            | 1.117431  | -0.935335 | 0.411035          | Co | 1.131026  | -0.924904 | 0.414487  |
| H             | 2.659167  | 0.725880  | -2.240114         | H  | 2.669072  | 0.740431  | -2.228543 |
| H             | 3.931106  | -0.296382 | -1.521806         | H  | 3.936455  | -0.269321 | -1.506097 |
| H             | 4.050186  | -0.496186 | 1.128746          | H  | 4.049393  | -0.465630 | 1.128265  |
| H             | 3.424676  | 0.924500  | 1.961272          | H  | 3.415556  | 0.940477  | 1.960503  |
| H             | 1.741924  | 2.352389  | 1.005478          | H  | 1.735342  | 2.363075  | 0.998800  |
| H             | 1.008457  | 2.051864  | -0.570794         | H  | 1.011668  | 2.059918  | -0.570485 |
| H             | 5.109464  | 2.259876  | 0.903165          | H  | 5.088176  | 2.288046  | 0.911039  |

---

|   |           |           |           |   |           |           |           |
|---|-----------|-----------|-----------|---|-----------|-----------|-----------|
| H | 5.708835  | 0.804865  | 0.094376  | H | 5.699671  | 0.844951  | 0.111295  |
| H | 4.843455  | 2.150031  | -1.799490 | H | 4.837737  | 2.173849  | -1.781938 |
| H | 2.658180  | 3.311846  | -1.638454 | H | 2.653202  | 3.319735  | -1.633320 |
| H | 3.411388  | 3.679276  | -0.078740 | H | 3.395162  | 3.693873  | -0.080712 |
| C | 2.266247  | -1.925090 | -0.475621 | C | 2.244376  | -1.907687 | -0.527307 |
| C | 0.975763  | 0.004595  | 1.920989  | C | 0.959720  | 0.027347  | 1.914249  |
| O | 3.031102  | -2.611662 | -1.000853 | O | 2.974067  | -2.580764 | -1.088367 |
| O | 0.941835  | 0.532018  | 2.946030  | O | 0.908731  | 0.559466  | 2.920457  |
| C | 0.562293  | -2.385815 | 1.306834  | C | 0.634100  | -2.379200 | 1.334151  |
| O | 0.309771  | -3.320789 | 1.933464  | O | 0.415379  | -3.303416 | 1.964675  |
| O | -1.276114 | -3.758292 | -1.159627 | O | -1.208825 | -3.757156 | -1.114070 |
| C | -1.357203 | -2.654185 | -0.847819 | C | -1.317112 | -2.663727 | -0.823459 |
| C | 0.124765  | -0.360527 | -1.221774 | C | 0.112688  | -0.343809 | -1.229343 |
| O | 0.432160  | 0.018282  | -2.284577 | O | 0.423975  | 0.045033  | -2.271963 |

---

**Table S13.** Optimized coordinates for the (nor)<sub>2</sub>Co(CO)<sub>7</sub> structure **7S-b3**.

| B3PW91-D3/DZP |           |           | B3PW91-D3/cc-pVTZ |    |           |           |           |
|---------------|-----------|-----------|-------------------|----|-----------|-----------|-----------|
| x             | y         | z         | x                 | y  | z         |           |           |
| C             | -3.038405 | -0.378617 | -1.951766         | C  | -3.047781 | -0.368533 | -1.938665 |
| C             | -2.768951 | -0.186191 | -0.432532         | C  | -2.775043 | -0.187600 | -0.423243 |
| C             | -2.886317 | 1.339685  | -0.278486         | C  | -2.900249 | 1.332409  | -0.260575 |
| C             | -4.270350 | 1.435354  | -0.939651         | C  | -4.284816 | 1.424762  | -0.911860 |
| C             | -5.094720 | 0.443319  | -0.094508         | C  | -5.096404 | 0.428397  | -0.069881 |
| C             | -3.993401 | 0.797233  | -2.308119         | C  | -4.014424 | 0.796433  | -2.279951 |
| C             | -4.059740 | -0.664693 | 0.275100          | C  | -4.058496 | -0.676010 | 0.282074  |
| Co            | -0.996897 | -0.999507 | 0.400624          | Co | -1.003595 | -1.007805 | 0.394591  |
| H             | -2.108218 | 1.891032  | -0.820069         | H  | -2.131568 | 1.887773  | -0.801146 |
| H             | -2.895044 | 1.666582  | 0.766504          | H  | -2.903062 | 1.653081  | 0.780812  |
| H             | -3.945518 | -0.727444 | 1.360474          | H  | -3.940301 | -0.750792 | 1.360922  |
| H             | -4.358791 | -1.660919 | -0.069784         | H  | -4.352124 | -1.665463 | -0.070714 |
| H             | -3.505662 | -1.350227 | -2.142374         | H  | -3.499746 | -1.340159 | -2.135993 |
| H             | -2.130148 | -0.335301 | -2.552823         | H  | -2.146492 | -0.308988 | -2.539194 |
| H             | -5.954450 | 0.051545  | -0.650668         | H  | -5.957189 | 0.040412  | -0.616843 |
| H             | -5.479793 | 0.928609  | 0.810267          | H  | -5.473393 | 0.903992  | 0.837362  |
| H             | -4.702468 | 2.440719  | -0.991985         | H  | -4.720932 | 2.422716  | -0.957158 |
| H             | -3.497883 | 1.514535  | -2.973999         | H  | -3.534240 | 1.516848  | -2.945418 |
| H             | -4.910915 | 0.460551  | -2.804894         | H  | -4.928359 | 0.455405  | -2.768957 |
| C             | -1.632263 | -0.402200 | 1.983962          | C  | -1.627450 | -0.404577 | 1.980694  |
| C             | -1.568854 | -2.338059 | -0.561901         | C  | -1.547240 | -2.343202 | -0.592658 |
| O             | -2.044194 | -0.064791 | 3.006329          | O  | -2.030347 | -0.068481 | 2.991564  |
| O             | -1.961239 | -3.254792 | -1.144277         | O  | -1.916966 | -3.243405 | -1.187931 |
| C             | 3.038421  | 0.378101  | -1.951868         | C  | 3.047769  | 0.367990  | -1.938768 |
| C             | 2.768945  | 0.186057  | -0.432586         | C  | 2.775036  | 0.187467  | -0.423295 |
| C             | 2.886218  | -1.339788 | -0.278161         | C  | 2.900202  | -1.332501 | -0.260225 |
| C             | 4.270237  | -1.435709 | -0.939316         | C  | 4.284763  | -1.425065 | -0.911491 |
| C             | 5.094679  | -0.443509 | -0.094435         | C  | 5.096382  | -0.428500 | -0.069780 |
| C             | 3.993305  | -0.797922 | -2.307942         | C  | 4.014383  | -0.797090 | -2.279748 |
| C             | 4.059763  | 0.664642  | 0.274937          | C  | 4.058507  | 0.676031  | 0.281884  |
| Co            | 0.996927  | 0.999645  | 0.400380          | Co | 1.003608  | 1.007928  | 0.394325  |
| H             | 2.108078  | -1.891227 | -0.819592         | H  | 2.131501  | -1.887986 | -0.800644 |
| H             | 2.894937  | -1.666414 | 0.766913          | H  | 2.903013  | -1.652897 | 0.781247  |
| H             | 3.945542  | 0.727627  | 1.360297          | H  | 3.940318  | 0.751105  | 1.360713  |
| H             | 4.358871  | 1.660778  | -0.070160         | H  | 4.352161  | 1.665381  | -0.071170 |
| H             | 3.505777  | 1.349621  | -2.142693         | H  | 3.499755  | 1.339553  | -2.136359 |
| H             | 2.130163  | 0.334742  | -2.552921         | H  | 2.146475  | 0.308305  | -2.539274 |
| H             | 5.954409  | -0.051908 | -0.650717         | H  | 5.957177  | -0.040684 | -0.616847 |



---

|   |           |           |           |   |           |           |           |
|---|-----------|-----------|-----------|---|-----------|-----------|-----------|
| H | 5.479759  | -0.928598 | 0.810445  | H | 5.473360  | -0.903864 | 0.837589  |
| H | 4.702293  | -2.441113 | -0.991399 | H | 4.720851  | -2.423042 | -0.956527 |
| H | 3.497702  | -1.515358 | -2.973614 | H | 3.534180  | -1.517669 | -2.945023 |
| H | 4.910831  | -0.461449 | -2.804837 | H | 4.928326  | -0.456214 | -2.768845 |
| C | 1.568976  | 2.337915  | -0.562471 | C | 1.547320  | 2.343064  | -0.593238 |
| C | -0.181067 | 2.076426  | 1.223162  | C | -0.176463 | 2.079451  | 1.218144  |
| O | 1.961431  | 3.254486  | -1.145059 | O | 1.917084  | 3.243110  | -1.188726 |
| O | -0.815398 | 2.848008  | 1.795359  | O | -0.810312 | 2.835742  | 1.783844  |
| C | 1.632257  | 0.402799  | 1.983910  | C | 1.627456  | 0.405143  | 1.980601  |
| O | 2.044164  | 0.065699  | 3.006389  | O | 2.030351  | 0.069332  | 2.991567  |
| O | 0.815357  | -2.847424 | 1.796288  | O | 0.810277  | -2.835244 | 1.784665  |
| C | 0.181061  | -2.076030 | 1.223799  | C | 0.176453  | -2.079103 | 1.218736  |
| C | -0.000004 | -0.000101 | -0.974696 | C | -0.000002 | -0.000091 | -0.986086 |
| O | 0.000001  | -0.000233 | -2.143539 | O | -0.000023 | -0.000228 | -2.140643 |

---

**Table S14.** Optimized coordinates for the (nor)<sub>2</sub>Co(CO)<sub>7</sub> structure **7T-b4**.

| B3PW91-D3/DZP |           |           | B3PW91-D3/cc-pVTZ |    |           |           |           |
|---------------|-----------|-----------|-------------------|----|-----------|-----------|-----------|
|               | x         | y         | z                 |    | x         | y         | z         |
| Co            | 1.550314  | 1.005131  | -0.046710         | Co | 1.549032  | 1.012095  | -0.135717 |
| C             | 3.526633  | -1.055383 | 0.195453          | C  | 3.543249  | -1.038093 | 0.205417  |
| C             | 4.409824  | -1.556406 | 1.358684          | C  | 4.401420  | -1.592034 | 1.358069  |
| C             | 5.850195  | -1.378241 | 0.798338          | C  | 5.846185  | -1.436193 | 0.816991  |
| C             | 5.615621  | -0.806252 | -0.614798         | C  | 5.640914  | -0.825126 | -0.578396 |
| C             | 4.383449  | 0.086270  | -0.385226         | C  | 4.433716  | 0.090705  | -0.337946 |
| C             | 5.025185  | -1.917145 | -1.506008         | C  | 5.033154  | -1.894202 | -1.498711 |
| C             | 3.580753  | -2.091336 | -0.953500         | C  | 3.583932  | -2.044218 | -0.965709 |
| H             | 4.246277  | -0.941379 | 2.251687          | H  | 4.244437  | -1.000247 | 2.261441  |
| H             | 4.162451  | -2.588530 | 1.624269          | H  | 4.126652  | -2.618861 | 1.594125  |
| H             | 6.424201  | -0.673039 | 1.411113          | H  | 6.429605  | -0.764861 | 1.449541  |
| H             | 6.409474  | -2.320731 | 0.768036          | H  | 6.381337  | -2.386032 | 0.768912  |
| H             | 5.611008  | -2.841934 | -1.447235         | H  | 5.591540  | -2.830831 | -1.459462 |
| H             | 5.005929  | -1.603530 | -2.556417         | H  | 5.032647  | -1.557111 | -2.536677 |
| H             | 3.368201  | -3.098083 | -0.580387         | H  | 3.341562  | -3.049045 | -0.621629 |
| H             | 2.829557  | -1.855624 | -1.716065         | H  | 2.850471  | -1.772340 | -1.726199 |
| H             | 3.974957  | 0.502946  | -1.315746         | H  | 4.045666  | 0.540250  | -1.255808 |
| H             | 4.557873  | 0.900479  | 0.329161          | H  | 4.619501  | 0.878144  | 0.394873  |
| H             | 6.492328  | -0.311043 | -1.044997         | H  | 6.530282  | -0.345510 | -0.985666 |
| C             | 2.097485  | -0.769921 | 0.603982          | C  | 2.120036  | -0.727565 | 0.601894  |
| C             | 1.584951  | 2.613047  | -0.890342         | C  | 1.557003  | 2.590421  | -1.028533 |
| O             | 1.431021  | -1.550175 | 1.245008          | O  | 1.463295  | -1.468715 | 1.278800  |
| O             | 1.605588  | 3.630277  | -1.433973         | O  | 1.556374  | 3.579015  | -1.596251 |
| C             | -4.532896 | -2.291164 | 0.394151          | C  | -4.550294 | -2.306824 | 0.216804  |
| C             | -3.918140 | -0.906952 | 0.111530          | C  | -3.922343 | -0.911437 | 0.069749  |
| C             | -4.654885 | -0.483634 | -1.186679         | C  | -4.627373 | -0.372892 | -1.198867 |
| C             | -6.050110 | -0.646844 | -0.560705         | C  | -6.032836 | -0.581940 | -0.622836 |
| C             | -5.951931 | 0.287265  | 0.660853          | C  | -5.959478 | 0.237175  | 0.673790  |
| C             | -6.006701 | -2.110196 | -0.076278         | C  | -6.006758 | -2.077072 | -0.269212 |
| C             | -4.471193 | 0.125010  | 1.113869          | C  | -4.494947 | 0.028192  | 1.143700  |
| Co            | -1.040711 | 0.327134  | -0.211264         | Co | -1.042298 | 0.328041  | -0.107527 |
| H             | -4.460489 | -1.165093 | -2.023013         | H  | -4.415418 | -0.976176 | -2.082778 |
| H             | -4.422102 | 0.543466  | -1.489629         | H  | -4.383218 | 0.670004  | -1.403424 |
| H             | -3.914158 | 1.065272  | 1.026872          | H  | -3.935367 | 0.964914  | 1.152727  |
| H             | -4.367950 | -0.225877 | 2.146044          | H  | -4.416260 | -0.411002 | 2.138185  |
| H             | -4.446985 | -2.553773 | 1.453679          | H  | -4.489902 | -2.659976 | 1.246174  |
| H             | -4.011565 | -3.063394 | -0.181102         | H  | -4.020574 | -3.026344 | -0.407440 |
| H             | -6.662883 | 0.009013  | 1.446755          | H  | -6.686749 | -0.102239 | 1.412134  |

---

|   |           |           |           |   |           |           |           |
|---|-----------|-----------|-----------|---|-----------|-----------|-----------|
| H | -6.161488 | 1.324996  | 0.377155  | H | -6.158319 | 1.292196  | 0.480276  |
| H | -6.890413 | -0.423336 | -1.226110 | H | -6.853507 | -0.297302 | -1.280370 |
| H | -6.239482 | -2.797290 | -0.898117 | H | -6.221921 | -2.685647 | -1.148939 |
| H | -6.730633 | -2.296597 | 0.724967  | H | -6.748064 | -2.328660 | 0.490232  |
| C | -1.737366 | 1.770459  | -1.019250 | C | -1.714329 | 1.846930  | -0.783198 |
| C | -2.444799 | -0.858135 | -0.043068 | C | -2.450156 | -0.862984 | -0.041083 |
| O | -2.235957 | 2.710198  | -1.468455 | O | -2.181078 | 2.822072  | -1.148082 |
| O | -1.652830 | -1.777374 | -0.203902 | O | -1.665433 | -1.767314 | -0.230006 |
| C | -0.992478 | 0.884935  | 1.527725  | C | -0.983482 | 0.703770  | 1.690456  |
| O | -1.113500 | 1.240443  | 2.619587  | O | -1.042882 | 0.948235  | 2.800829  |
| O | 2.013860  | 1.860540  | 2.727060  | O | 1.957865  | 2.011169  | 2.582403  |
| C | 1.814571  | 1.527909  | 1.638721  | C | 1.787395  | 1.619967  | 1.523005  |
| C | 0.757292  | 0.112048  | -1.362968 | C | 0.751310  | 0.082782  | -1.409599 |
| O | 0.471048  | -0.460169 | -2.353142 | O | 0.376341  | -0.486106 | -2.351112 |

---

**Table S15.** Optimized coordinates for the (nor)<sub>2</sub>Co(CO)<sub>6</sub> structure **6T-b1**.

| B3PW91-D3/DZP |           |           | B3PW91-D3/cc-pVTZ |    |           |           |           |
|---------------|-----------|-----------|-------------------|----|-----------|-----------|-----------|
|               | x         | y         | z                 |    | x         | y         | z         |
| Co            | -1.233899 | 1.566713  | -0.285243         | Co | -1.253169 | 1.559722  | -0.285622 |
| C             | -2.532158 | -1.104012 | -0.209488         | C  | -2.524360 | -1.120786 | -0.183949 |
| C             | -3.699397 | -0.304925 | 0.402418          | C  | -3.679028 | -0.344311 | 0.469466  |
| C             | -4.642262 | -1.415581 | 0.950725          | C  | -4.611954 | -1.469002 | 0.992966  |
| C             | -3.916370 | -2.715084 | 0.551479          | C  | -3.896047 | -2.750873 | 0.543284  |
| C             | -2.446210 | -2.317783 | 0.746145          | C  | -2.427060 | -2.363193 | 0.727355  |
| C             | -3.994809 | -2.877235 | -0.980525         | C  | -3.998229 | -2.862944 | -0.986215 |
| C             | -3.023555 | -1.780132 | -1.509659         | C  | -3.039322 | -1.751989 | -1.494090 |
| H             | -3.334766 | 0.345915  | 1.209317          | H  | -3.302330 | 0.276457  | 1.286952  |
| H             | -4.192573 | 0.333765  | -0.338267         | H  | -4.179791 | 0.316254  | -0.238379 |
| H             | -4.737308 | -1.345290 | 2.040655          | H  | -4.692245 | -1.433565 | 2.080649  |
| H             | -5.651402 | -1.358634 | 0.526793          | H  | -5.622667 | -1.397984 | 0.588622  |
| H             | -5.017801 | -2.748923 | -1.353140         | H  | -5.022061 | -2.725912 | -1.337728 |
| H             | -3.655447 | -3.874529 | -1.283525         | H  | -3.665320 | -3.844951 | -1.325624 |
| H             | -3.507925 | -1.057973 | -2.176542         | H  | -3.531828 | -1.011236 | -2.124992 |
| H             | -2.174823 | -2.218652 | -2.045224         | H  | -2.204311 | -2.169991 | -2.056756 |
| H             | -1.722340 | -3.062595 | 0.399985          | H  | -1.713165 | -3.093271 | 0.347685  |
| H             | -2.198516 | -2.027861 | 1.775547          | H  | -2.162864 | -2.108119 | 1.756135  |
| H             | -4.249829 | -3.596423 | 1.109593          | H  | -4.222038 | -3.644845 | 1.074390  |
| C             | -1.224441 | -0.375299 | -0.358843         | C  | -1.226317 | -0.385957 | -0.339667 |
| C             | -1.221361 | 2.875569  | 0.994630          | C  | -1.233285 | 2.898336  | 0.966216  |
| O             | -0.199713 | -1.076223 | -0.665323         | O  | -0.204552 | -1.075135 | -0.644411 |
| O             | -1.204082 | 3.700945  | 1.799853          | O  | -1.212781 | 3.732865  | 1.740971  |
| C             | 3.706315  | 0.601678  | 0.224579          | C  | 3.723341  | 0.608296  | 0.195669  |
| C             | 3.215716  | -0.861076 | 0.177001          | C  | 3.229049  | -0.848983 | 0.180842  |
| C             | 2.975020  | -1.042110 | -1.342637         | C  | 2.994498  | -1.063782 | -1.332201 |
| C             | 4.410995  | -0.655453 | -1.726005         | C  | 4.429271  | -0.692053 | -1.717355 |
| C             | 5.237017  | -1.657935 | -0.894833         | C  | 5.245507  | -1.675532 | -0.864456 |
| C             | 4.533813  | 0.740668  | -1.086188         | C  | 4.555210  | 0.712329  | -1.109935 |
| C             | 4.414681  | -1.796487 | 0.420545          | C  | 4.422793  | -1.779314 | 0.447660  |
| Co            | 0.467697  | -0.014746 | 0.791984          | Co | 0.471380  | 0.005647  | 0.788910  |
| H             | 2.209203  | -0.364232 | -1.734071         | H  | 2.235831  | -0.395544 | -1.739597 |
| H             | 2.702771  | -2.071380 | -1.601842         | H  | 2.720544  | -2.093034 | -1.566769 |
| H             | 4.063068  | -2.820927 | 0.579369          | H  | 4.068434  | -2.793334 | 0.630779  |
| H             | 4.976255  | -1.500748 | 1.313398          | H  | 4.980026  | -1.465828 | 1.330992  |
| H             | 4.288461  | 0.799629  | 1.131317          | H  | 4.298090  | 0.825566  | 1.096526  |
| H             | 2.858651  | 1.299035  | 0.224898          | H  | 2.880768  | 1.303250  | 0.175629  |
| H             | 6.258372  | -1.300033 | -0.719454         | H  | 6.264063  | -1.321624 | -0.696854 |

---

|   |           |           |           |   |           |           |           |
|---|-----------|-----------|-----------|---|-----------|-----------|-----------|
| H | 5.309912  | -2.621781 | -1.412683 | H | 5.315747  | -2.646927 | -1.357204 |
| H | 4.636407  | -0.672603 | -2.797757 | H | 4.658233  | -0.733234 | -2.782089 |
| H | 4.099069  | 1.506894  | -1.738229 | H | 4.130843  | 1.463323  | -1.777928 |
| H | 5.577388  | 1.016706  | -0.896351 | H | 5.594188  | 0.987399  | -0.923004 |
| C | 0.287332  | 1.999511  | -1.205257 | C | 0.252733  | 1.991993  | -1.236388 |
| C | 1.986267  | -1.145557 | 1.006356  | C | 2.001507  | -1.112845 | 1.010277  |
| O | 1.248123  | 2.228209  | -1.802596 | O | 1.194176  | 2.212481  | -1.840421 |
| O | 1.830976  | -2.121023 | 1.710330  | O | 1.843086  | -2.067223 | 1.723558  |
| C | 0.941513  | 0.920909  | 2.202457  | C | 0.966968  | 0.976523  | 2.167875  |
| O | 1.266818  | 1.524175  | 3.132551  | O | 1.302246  | 1.598729  | 3.064370  |
| O | -3.120146 | 2.158080  | -2.483334 | O | -3.179963 | 2.123832  | -2.439554 |
| C | -2.412303 | 1.931037  | -1.600840 | C | -2.461531 | 1.907052  | -1.581745 |

---

**Table S16.** Optimized coordinates for the (nor)<sub>2</sub>Co(CO)<sub>6</sub> structure **6S-b2**.

| B3PW91-D3/DZP |           |           | B3PW91-D3/cc-pVTZ |    |           |           |           |
|---------------|-----------|-----------|-------------------|----|-----------|-----------|-----------|
| x             | y         | z         | x                 | y  | z         |           |           |
| Co            | -1.966758 | -0.982491 | -0.042459         | Co | -1.967559 | -1.009212 | -0.021272 |
| C             | -1.532702 | 1.599757  | 0.317800          | C  | -1.559158 | 1.599425  | 0.286482  |
| C             | -2.204416 | 2.361858  | 1.482779          | C  | -2.240940 | 2.362442  | 1.440879  |
| C             | -3.096610 | 3.405014  | 0.753240          | C  | -3.146999 | 3.379795  | 0.702110  |
| C             | -2.810045 | 3.136145  | -0.736123         | C  | -2.860938 | 3.099072  | -0.779534 |
| C             | -2.658836 | 1.601220  | -0.747716         | C  | -2.683697 | 1.571138  | -0.773319 |
| C             | -1.374500 | 3.595307  | -1.054492         | C  | -1.439602 | 3.577051  | -1.105716 |
| C             | -0.492747 | 2.523378  | -0.357005         | C  | -0.539562 | 2.536515  | -0.394242 |
| H             | -2.804531 | 1.671036  | 2.086575          | H  | -2.827435 | 1.672663  | 2.049879  |
| H             | -1.452185 | 2.807033  | 2.141492          | H  | -1.499084 | 2.823499  | 2.091826  |
| H             | -4.156215 | 3.239328  | 0.980137          | H  | -4.198659 | 3.202542  | 0.932774  |
| H             | -2.854683 | 4.435853  | 1.035992          | H  | -2.922596 | 4.412783  | 0.971443  |
| H             | -1.180057 | 4.606958  | -0.680282         | H  | -1.263325 | 4.593870  | -0.751908 |
| H             | -1.196441 | 3.600365  | -2.135856         | H  | -1.263636 | 3.568172  | -2.182268 |
| H             | 0.207494  | 2.929129  | 0.380400          | H  | 0.143597  | 2.964892  | 0.338242  |
| H             | 0.079272  | 1.950667  | -1.092601         | H  | 0.048658  | 1.972907  | -1.116331 |
| H             | -2.337855 | 1.211610  | -1.721766         | H  | -2.359045 | 1.174659  | -1.737324 |
| H             | -3.579574 | 1.098017  | -0.426302         | H  | -3.589434 | 1.056747  | -0.445098 |
| H             | -3.568092 | 3.539380  | -1.414846         | H  | -3.623448 | 3.480166  | -1.457236 |
| C             | -0.889224 | 0.313816  | 0.799026          | C  | -0.901416 | 0.329525  | 0.776205  |
| C             | -3.135851 | -1.676845 | -1.209752         | C  | -3.147494 | -1.779920 | -1.127666 |
| O             | 0.042242  | 0.348752  | 1.647259          | O  | 0.038110  | 0.386872  | 1.599680  |
| O             | -3.926153 | -2.083611 | -1.943210         | O  | -3.933535 | -2.232610 | -1.815723 |
| C             | 4.064825  | -0.630540 | -0.744099         | C  | 4.085852  | -0.603183 | -0.767515 |
| C             | 2.869406  | 0.304859  | -0.413753         | C  | 2.893860  | 0.313084  | -0.392545 |
| C             | 3.091379  | 0.600013  | 1.077517          | C  | 3.132207  | 0.554525  | 1.101606  |
| C             | 4.521846  | 1.122020  | 0.874722          | C  | 4.553758  | 1.089876  | 0.900758  |
| C             | 4.304840  | 2.240007  | -0.164695         | C  | 4.319423  | 2.240338  | -0.090167 |
| C             | 5.191066  | -0.076111 | 0.175359          | C  | 5.217470  | -0.074448 | 0.152145  |
| C             | 3.163427  | 1.679897  | -1.059938         | C  | 3.174452  | 1.709172  | -0.989325 |
| H             | 3.038064  | -0.292317 | 1.709877          | H  | 3.094693  | -0.356149 | 1.698658  |
| H             | 2.389264  | 1.343892  | 1.466851          | H  | 2.434112  | 1.275723  | 1.524643  |
| H             | 2.277151  | 2.319904  | -1.019530         | H  | 2.288115  | 2.337437  | -0.914796 |
| H             | 3.440387  | 1.570493  | -2.112781         | H  | 3.436140  | 1.640025  | -2.044140 |
| H             | 4.305821  | -0.582553 | -1.810910         | H  | 4.310174  | -0.522031 | -1.830667 |
| H             | 3.837797  | -1.674266 | -0.506998         | H  | 3.864376  | -1.649366 | -0.560845 |
| H             | 5.217626  | 2.456026  | -0.732037         | H  | 5.219998  | 2.482760  | -0.656438 |
| H             | 3.993047  | 3.169296  | 0.326348          | H  | 4.010761  | 3.145232  | 0.435791  |

---

|    |           |           |           |    |           |           |           |
|----|-----------|-----------|-----------|----|-----------|-----------|-----------|
| H  | 5.040872  | 1.451815  | 1.780320  | H  | 5.080488  | 1.387711  | 1.806345  |
| H  | 5.496184  | -0.831060 | 0.909090  | H  | 5.538118  | -0.848827 | 0.850606  |
| H  | 6.082734  | 0.219301  | -0.389478 | H  | 6.095483  | 0.244555  | -0.411287 |
| C  | -2.773818 | -1.336232 | 1.472891  | C  | -2.757796 | -1.291460 | 1.517560  |
| C  | 1.566011  | -0.302946 | -0.900289 | C  | 1.592428  | -0.275624 | -0.887724 |
| O  | -3.261742 | -1.689936 | 2.461250  | O  | -3.223271 | -1.586023 | 2.519787  |
| O  | 1.176653  | -0.196636 | -2.036182 | O  | 1.204121  | -0.148409 | -2.009819 |
| C  | -0.617047 | -2.141338 | -0.847389 | C  | -0.596828 | -2.122792 | -0.884783 |
| O  | -0.571837 | -3.071614 | -1.565294 | O  | -0.531797 | -3.015060 | -1.626806 |
| C  | 1.625699  | -2.331292 | 0.740163  | C  | 1.628685  | -2.314353 | 0.712603  |
| O  | 2.347546  | -3.189615 | 1.021669  | O  | 2.350502  | -3.161453 | 0.973418  |
| Co | 0.425796  | -1.132567 | 0.331085  | Co | 0.427065  | -1.116995 | 0.313752  |

---

**Table S17.** Optimized coordinates for the (nor)<sub>2</sub>Co(CO)<sub>6</sub> structure **6S-b3**.

| B3PW91-D3/DZP |           |           | B3PW91-D3/cc-pVTZ |    |           |           |           |
|---------------|-----------|-----------|-------------------|----|-----------|-----------|-----------|
| x             | y         | z         | x                 | y  | z         |           |           |
| Co            | 1.520392  | -1.435250 | -0.116817         | Co | 1.520938  | -1.435525 | -0.126841 |
| C             | 1.822876  | 1.487721  | -0.431515         | C  | 1.819275  | 1.496498  | -0.416879 |
| C             | 3.254089  | 1.500975  | -1.013064         | C  | 3.235777  | 1.539867  | -1.023096 |
| C             | 3.991090  | 2.518582  | -0.092478         | C  | 3.976215  | 2.543510  | -0.098233 |
| C             | 2.917986  | 2.904630  | 0.945028          | C  | 2.920828  | 2.901461  | 0.958802  |
| C             | 2.125283  | 1.597941  | 1.080149          | C  | 2.146965  | 1.587758  | 1.087213  |
| C             | 1.880296  | 3.813129  | 0.258621          | C  | 1.866566  | 3.806237  | 0.306076  |
| C             | 1.171309  | 2.854956  | -0.739159         | C  | 1.151149  | 2.859937  | -0.690336 |
| H             | 3.711452  | 0.510232  | -0.929507         | H  | 3.703899  | 0.558499  | -0.971538 |
| H             | 3.260048  | 1.782510  | -2.071545         | H  | 3.216098  | 1.842266  | -2.070280 |
| H             | 4.855101  | 2.047847  | 0.390962          | H  | 4.847293  | 2.073234  | 0.360862  |
| H             | 4.357359  | 3.392535  | -0.643562         | H  | 4.327975  | 3.425059  | -0.636315 |
| H             | 2.349952  | 4.671036  | -0.236767         | H  | 2.316198  | 4.673047  | -0.181028 |
| H             | 1.163610  | 4.198258  | 0.992904          | H  | 1.162439  | 4.173084  | 1.054347  |
| H             | 1.321275  | 3.133013  | -1.787894         | H  | 1.279057  | 3.153370  | -1.732534 |
| H             | 0.095369  | 2.816205  | -0.557783         | H  | 0.083901  | 2.809418  | -0.493705 |
| H             | 1.211434  | 1.689203  | 1.676840          | H  | 1.246267  | 1.658130  | 1.697466  |
| H             | 2.717336  | 0.747413  | 1.446090          | H  | 2.750970  | 0.742005  | 1.427212  |
| H             | 3.323992  | 3.315568  | 1.875219          | H  | 3.336589  | 3.301419  | 1.883012  |
| C             | 0.966090  | 0.296358  | -0.797269         | C  | 0.972805  | 0.306614  | -0.791520 |
| C             | 2.154847  | -2.649278 | 1.061896          | C  | 2.130055  | -2.661265 | 1.054668  |
| O             | -0.086109 | 0.424913  | -1.484359         | O  | -0.074347 | 0.441338  | -1.468723 |
| O             | 2.631479  | -3.409827 | 1.785466          | O  | 2.577257  | -3.422403 | 1.774310  |
| C             | -4.023546 | 0.580615  | 1.202847          | C  | -4.022718 | 0.551084  | 1.196926  |
| C             | -2.896211 | 0.626885  | 0.148679          | C  | -2.893233 | 0.619148  | 0.151648  |
| C             | -3.073641 | -0.752981 | -0.555484         | C  | -3.076978 | -0.737519 | -0.587279 |
| C             | -4.549434 | -0.478564 | -0.918092         | C  | -4.546425 | -0.445361 | -0.946037 |
| C             | -4.432074 | 0.834745  | -1.714354         | C  | -4.419719 | 0.882839  | -1.704187 |
| C             | -5.161355 | -0.176342 | 0.462478          | C  | -5.158470 | -0.176799 | 0.435109  |
| C             | -3.286531 | 1.595997  | -0.989154         | C  | -3.276815 | 1.617106  | -0.958144 |
| Co            | -0.610717 | -0.466204 | 0.231551          | Co | -0.609110 | -0.472362 | 0.221717  |
| H             | -2.969017 | -1.621298 | 0.108983          | H  | -2.979120 | -1.618117 | 0.052578  |
| H             | -2.458495 | -0.886010 | -1.454155         | H  | -2.461244 | -0.851089 | -1.482019 |
| H             | -2.427347 | 1.757251  | -1.649299         | H  | -2.419285 | 1.791730  | -1.608487 |
| H             | -3.586780 | 2.566176  | -0.581353         | H  | -3.570720 | 2.573163  | -0.526871 |
| H             | -4.294599 | 1.592486  | 1.519131          | H  | -4.286650 | 1.550725  | 1.539254  |
| H             | -3.690700 | 0.034932  | 2.093763          | H  | -3.697128 | -0.017815 | 2.069533  |
| H             | -5.373897 | 1.395207  | -1.712202         | H  | -5.354219 | 1.445415  | -1.692537 |



---

|   |           |           |           |   |           |           |           |
|---|-----------|-----------|-----------|---|-----------|-----------|-----------|
| H | -4.166328 | 0.633386  | -2.758330 | H | -4.153001 | 0.708705  | -2.747482 |
| H | -5.051401 | -1.285555 | -1.460902 | H | -5.049102 | -1.230707 | -1.508425 |
| H | -5.418651 | -1.104878 | 0.985059  | H | -5.422833 | -1.112559 | 0.929899  |
| H | -6.075510 | 0.422176  | 0.379223  | H | -6.065281 | 0.425352  | 0.365988  |
| C | -0.047061 | -2.272308 | -0.642056 | C | -0.024424 | -2.277554 | -0.695960 |
| C | -1.559694 | 1.018368  | 0.767210  | C | -1.562621 | 0.994074  | 0.786212  |
| O | -0.513396 | -3.214066 | -1.147341 | O | -0.494768 | -3.188848 | -1.220190 |
| O | -1.346431 | 2.049642  | 1.353116  | O | -1.354438 | 2.001124  | 1.391707  |
| C | -0.359635 | -0.872512 | 1.889482  | C | -0.393242 | -0.926303 | 1.872334  |
| O | -0.198619 | -1.096123 | 3.014323  | O | -0.260749 | -1.180674 | 2.980179  |
| O | 3.398748  | -1.893568 | -2.266422 | O | 3.485567  | -1.857101 | -2.187839 |
| C | 2.688511  | -1.654947 | -1.383926 | C | 2.745072  | -1.632812 | -1.345006 |

---

**Table S18.** Optimized coordinates for the (nor)<sub>2</sub>Co(CO)<sub>6</sub> structure **6T-b4**.

| B3PW91-D3/DZP |           |           |           | B3PW91-D3/cc-pVTZ |           |           |           |
|---------------|-----------|-----------|-----------|-------------------|-----------|-----------|-----------|
|               | x         | y         | z         |                   | x         | y         | z         |
| Co            | 1.045952  | -1.188500 | 0.811304  | Co                | 1.059739  | -1.186932 | 0.816903  |
| C             | 2.147338  | 1.001308  | -0.576898 | C                 | 2.144867  | 1.009106  | -0.571771 |
| C             | 3.570482  | 0.862277  | -1.166081 | C                 | 3.566132  | 0.907993  | -1.162842 |
| C             | 4.353534  | 2.003310  | -0.455606 | C                 | 4.319539  | 2.063251  | -0.453960 |
| C             | 3.293017  | 2.647907  | 0.459347  | C                 | 3.249291  | 2.679056  | 0.460388  |
| C             | 2.458950  | 1.423096  | 0.875159  | C                 | 2.448685  | 1.437169  | 0.875973  |
| C             | 2.284889  | 3.417854  | -0.415971 | C                 | 2.225409  | 3.422536  | -0.409532 |
| C             | 1.507568  | 2.286987  | -1.146266 | C                 | 1.475281  | 2.278033  | -1.136059 |
| H             | 3.986913  | -0.122094 | -0.921071 | H                 | 4.004838  | -0.061786 | -0.921322 |
| H             | 3.554118  | 0.948855  | -2.256731 | H                 | 3.545263  | 0.994255  | -2.248248 |
| H             | 5.182885  | 1.599127  | 0.136411  | H                 | 5.155859  | 1.680661  | 0.133213  |
| H             | 4.774826  | 2.727101  | -1.162711 | H                 | 4.722065  | 2.794113  | -1.156804 |
| H             | 2.785147  | 4.101624  | -1.111233 | H                 | 2.704931  | 4.115559  | -1.102188 |
| H             | 1.609815  | 4.015773  | 0.208534  | H                 | 1.541348  | 4.002723  | 0.212730  |
| H             | 1.596182  | 2.318958  | -2.236321 | H                 | 1.557327  | 2.312323  | -2.221385 |
| H             | 0.440265  | 2.318109  | -0.903266 | H                 | 0.413455  | 2.282181  | -0.890434 |
| H             | 1.567985  | 1.688392  | 1.457042  | H                 | 1.556236  | 1.677112  | 1.456662  |
| H             | 3.046922  | 0.680785  | 1.432010  | H                 | 3.052698  | 0.712002  | 1.427383  |
| H             | 3.712834  | 3.239832  | 1.278826  | H                 | 3.654468  | 3.277656  | 1.275038  |
| C             | 1.311119  | -0.234481 | -0.814964 | C                 | 1.334973  | -0.238174 | -0.811696 |
| C             | 0.123055  | -1.452997 | 2.368436  | C                 | 0.125040  | -1.469250 | 2.366149  |
| O             | 1.044578  | -0.569424 | -2.001244 | O                 | 1.087761  | -0.579532 | -1.989976 |
| O             | -0.417778 | -1.588025 | 3.376656  | O                 | -0.416507 | -1.616785 | 3.355995  |
| C             | -3.881946 | 0.943801  | 1.021359  | C                 | -3.887364 | 0.894285  | 1.030785  |
| C             | -2.463681 | 0.723954  | 0.457175  | C                 | -2.473463 | 0.699937  | 0.455436  |
| C             | -2.488358 | 1.600529  | -0.810283 | C                 | -2.522512 | 1.584164  | -0.801819 |
| C             | -2.885724 | 2.881149  | -0.060054 | C                 | -2.933757 | 2.848502  | -0.040836 |
| C             | -1.761186 | 2.988040  | 0.988701  | C                 | -1.805787 | 2.965638  | 0.994716  |
| C             | -4.176936 | 2.426859  | 0.652426  | C                 | -4.206779 | 2.370494  | 0.676864  |
| C             | -1.465218 | 1.503323  | 1.339787  | C                 | -1.485421 | 1.488275  | 1.335003  |
| H             | -3.237752 | 1.271435  | -1.540271 | H                 | -3.267956 | 1.248114  | -1.524895 |
| H             | -1.514104 | 1.665280  | -1.312774 | H                 | -1.557724 | 1.667533  | -1.307674 |
| H             | -0.442798 | 1.216847  | 1.068104  | H                 | -0.464664 | 1.220704  | 1.058717  |
| H             | -1.602094 | 1.265905  | 2.399973  | H                 | -1.611777 | 1.243244  | 2.389499  |
| H             | -3.916755 | 0.745747  | 2.096981  | H                 | -3.911675 | 0.686744  | 2.099755  |
| H             | -4.587678 | 0.254955  | 0.544992  | H                 | -4.582287 | 0.201073  | 0.556427  |
| H             | -2.071150 | 3.572779  | 1.862377  | H                 | -2.112940 | 3.539922  | 1.869895  |
| H             | -0.875100 | 3.477600  | 0.565498  | H                 | -0.934942 | 3.467479  | 0.567977  |

---

|    |           |           |           |    |           |           |           |
|----|-----------|-----------|-----------|----|-----------|-----------|-----------|
| H  | -3.007448 | 3.778964  | -0.675225 | H  | -3.075011 | 3.744325  | -0.644909 |
| H  | -5.036038 | 2.497987  | -0.025234 | H  | -5.069468 | 2.434197  | 0.011337  |
| H  | -4.397627 | 3.046421  | 1.529567  | H  | -4.429297 | 2.977783  | 1.555767  |
| C  | 2.644679  | -2.025952 | 0.880434  | C  | 2.670032  | -1.999930 | 0.907947  |
| C  | -2.074925 | -0.739758 | 0.283773  | C  | -2.067611 | -0.752761 | 0.268154  |
| O  | 3.647055  | -2.598340 | 0.864794  | O  | 3.670284  | -2.547393 | 0.906966  |
| O  | -2.656948 | -1.622546 | 0.879523  | O  | -2.639333 | -1.640031 | 0.844350  |
| C  | -0.446650 | -2.875349 | -0.609915 | C  | -0.431826 | -2.881966 | -0.635459 |
| O  | -0.406058 | -3.994836 | -0.345867 | O  | -0.392181 | -3.988840 | -0.380489 |
| C  | -1.934640 | -1.231801 | -2.293559 | C  | -1.899418 | -1.211438 | -2.313822 |
| O  | -2.757652 | -1.396493 | -3.083123 | O  | -2.707575 | -1.360891 | -3.101420 |
| Co | -0.671401 | -1.072737 | -1.026985 | Co | -0.644266 | -1.069352 | -1.034743 |

---

**Table S19.** Optimized coordinates for the (nor)<sub>2</sub>Co(CO)<sub>5</sub> structure **5T-b1**.

| B3PW91-D3/DZP |           |           | B3PW91-D3/cc-pVTZ |    |           |           |           |
|---------------|-----------|-----------|-------------------|----|-----------|-----------|-----------|
|               | x         | y         | z                 |    | x         | y         | z         |
| Co            | -1.171931 | 1.774684  | 0.267605          | Co | -1.172866 | 1.765514  | 0.254738  |
| C             | -2.706946 | -0.697804 | -0.306840         | C  | -2.716146 | -0.702557 | -0.290040 |
| C             | -3.771055 | -0.011627 | 0.568041          | C  | -3.777141 | -0.007906 | 0.574499  |
| C             | -4.801347 | -1.148383 | 0.832395          | C  | -4.818330 | -1.130663 | 0.829733  |
| C             | -4.217042 | -2.335824 | 0.041495          | C  | -4.242804 | -2.320758 | 0.047344  |
| C             | -2.710201 | -2.137248 | 0.261073          | C  | -2.740101 | -2.139204 | 0.276493  |
| C             | -4.352976 | -2.043778 | -1.467545         | C  | -4.365104 | -2.029559 | -1.457296 |
| C             | -3.294170 | -0.928105 | -1.716155         | C  | -3.298460 | -0.926772 | -1.698869 |
| H             | -3.319239 | 0.345586  | 1.505813          | H  | -3.330343 | 0.342685  | 1.510740  |
| H             | -4.216166 | 0.853901  | 0.065298          | H  | -4.206717 | 0.858687  | 0.071562  |
| H             | -4.858168 | -1.386213 | 1.901097          | H  | -4.887412 | -1.365228 | 1.893191  |
| H             | -5.811595 | -0.885929 | 0.498030          | H  | -5.818582 | -0.858927 | 0.489710  |
| H             | -5.368550 | -1.727127 | -1.732506         | H  | -5.371306 | -1.707082 | -1.729594 |
| H             | -4.121270 | -2.937777 | -2.058017         | H  | -4.138786 | -2.921519 | -2.043442 |
| H             | -3.723054 | -0.006381 | -2.124962         | H  | -3.713819 | -0.004951 | -2.107473 |
| H             | -2.505804 | -1.264746 | -2.397745         | H  | -2.513197 | -1.268239 | -2.373488 |
| H             | -2.071571 | -2.809588 | -0.321334         | H  | -2.107423 | -2.814704 | -0.298761 |
| H             | -2.405992 | -2.176466 | 1.314836          | H  | -2.444169 | -2.180361 | 1.326969  |
| H             | -4.619167 | -3.308654 | 0.343788          | H  | -4.656401 | -3.283807 | 0.345752  |
| C             | -1.346522 | -0.061573 | -0.292400         | C  | -1.354346 | -0.080652 | -0.274080 |
| O             | -0.386226 | -0.664899 | -0.881864         | O  | -0.404474 | -0.691553 | -0.851745 |
| C             | 3.797978  | 0.323301  | 0.577555          | C  | 3.812765  | 0.319855  | 0.561626  |
| C             | 3.104359  | -0.904457 | -0.052502         | C  | 3.109506  | -0.904515 | -0.053714 |
| C             | 2.855522  | -0.394743 | -1.492770         | C  | 2.857100  | -0.403793 | -1.492836 |
| C             | 4.335278  | -0.078507 | -1.753932         | C  | 4.333207  | -0.099873 | -1.763508 |
| C             | 5.000674  | -1.438885 | -1.460436         | C  | 4.988946  | -1.457993 | -1.467140 |
| C             | 4.649950  | 0.888252  | -0.596357         | C  | 4.660331  | 0.867672  | -0.617230 |
| C             | 4.155497  | -2.005882 | -0.281555         | C  | 4.152414  | -2.009359 | -0.281702 |
| H             | 2.200562  | 0.483228  | -1.525593         | H  | 2.210657  | 0.474126  | -1.526838 |
| H             | 2.438340  | -1.169720 | -2.145463         | H  | 2.432552  | -1.176680 | -2.134540 |
| H             | 3.661388  | -2.946651 | -0.545346         | H  | 3.653743  | -2.945631 | -0.531724 |
| H             | 4.744843  | -2.189987 | 0.623082          | H  | 4.743636  | -2.189063 | 0.616484  |
| H             | 4.394633  | 0.039587  | 1.451427          | H  | 4.407558  | 0.040394  | 1.431685  |
| H             | 3.055618  | 1.058288  | 0.910420          | H  | 3.079338  | 1.057760  | 0.890507  |
| H             | 6.061363  | -1.328097 | -1.205829         | H  | 6.047824  | -1.354139 | -1.224390 |
| H             | 4.938999  | -2.095748 | -2.336402         | H  | 4.917364  | -2.117373 | -2.334059 |
| H             | 4.567424  | 0.326119  | -2.744983         | H  | 4.562076  | 0.295504  | -2.752988 |
| H             | 4.335827  | 1.908511  | -0.845337         | H  | 4.356520  | 1.884888  | -0.869303 |

---

|    |           |           |           |    |           |           |           |
|----|-----------|-----------|-----------|----|-----------|-----------|-----------|
| H  | 5.720553  | 0.916073  | -0.362917 | H  | 5.727303  | 0.889425  | -0.390602 |
| C  | 0.480043  | 2.466355  | -0.069821 | C  | 0.476048  | 2.482473  | -0.062543 |
| C  | 1.845247  | -1.334803 | 0.658807  | C  | 1.858856  | -1.325398 | 0.667757  |
| O  | 1.524136  | 2.890779  | -0.333020 | O  | 1.504096  | 2.918731  | -0.305691 |
| O  | 1.613741  | -2.464449 | 1.041329  | O  | 1.635809  | -2.440144 | 1.063760  |
| C  | 0.862260  | 0.366284  | 2.406706  | C  | 0.892861  | 0.392552  | 2.396005  |
| O  | 1.182619  | 0.689542  | 3.471026  | O  | 1.229452  | 0.728648  | 3.436015  |
| O  | -2.869104 | 3.136821  | -1.692205 | O  | -2.843161 | 3.115663  | -1.719697 |
| C  | -2.262581 | 2.649040  | -0.835522 | C  | -2.251548 | 2.636438  | -0.866946 |
| Co | 0.380668  | -0.123952 | 0.797917  | Co | 0.380551  | -0.123530 | 0.804304  |

---

**Table S20.** Optimized coordinates for the (nor)<sub>2</sub>Co(CO)<sub>5</sub> structure **5S-b2**.

| B3PW91-D3/DZP |           |           | B3PW91-D3/cc-pVTZ |    |           |           |           |
|---------------|-----------|-----------|-------------------|----|-----------|-----------|-----------|
| x             | y         | z         | x                 | y  | z         |           |           |
| C             | -3.205041 | -0.195553 | 1.606647          | C  | -3.110418 | -0.298029 | 1.677056  |
| C             | -2.476782 | -0.180256 | 0.247057          | C  | -2.451624 | -0.254031 | 0.287217  |
| C             | -2.187064 | -1.684739 | 0.054105          | C  | -2.069357 | -1.735178 | 0.100513  |
| C             | -3.652458 | -2.116792 | 0.203333          | C  | -3.488490 | -2.263796 | 0.326905  |
| C             | -4.332465 | -1.267035 | -0.889276         | C  | -4.275226 | -1.484100 | -0.737975 |
| C             | -4.002022 | -1.534033 | 1.584172          | C  | -3.810582 | -1.684548 | 1.709705  |
| C             | -3.532189 | 0.075151  | -0.855456         | C  | -3.569582 | -0.095182 | -0.763602 |
| Co            | -1.006635 | 1.146574  | -0.154321         | Co | -1.062582 | 1.159601  | -0.158674 |
| H             | -1.524974 | -2.097555 | 0.823572          | H  | -1.346094 | -2.086905 | 0.837583  |
| H             | -1.772705 | -1.926950 | -0.930378         | H  | -1.687867 | -1.959877 | -0.895711 |
| H             | -3.072772 | 0.274747  | -1.831394         | H  | -3.168485 | 0.115005  | -1.756919 |
| H             | -4.163728 | 0.937664  | -0.613062         | H  | -4.242768 | 0.724891  | -0.509783 |
| H             | -3.863837 | 0.671034  | 1.727615          | H  | -3.815953 | 0.520687  | 1.818623  |
| H             | -2.482645 | -0.175987 | 2.429399          | H  | -2.357890 | -0.216704 | 2.461255  |
| H             | -5.400711 | -1.117950 | -0.691643         | H  | -5.335290 | -1.405212 | -0.490793 |
| H             | -4.239382 | -1.749962 | -1.869407         | H  | -4.199929 | -1.974656 | -1.710133 |
| H             | -3.846876 | -3.191043 | 0.110444          | H  | -3.611757 | -3.344756 | 0.259273  |
| H             | -3.667490 | -2.206577 | 2.383267          | H  | -3.396064 | -2.315516 | 2.498150  |
| H             | -5.081355 | -1.384347 | 1.707594          | H  | -4.885395 | -1.607595 | 1.883178  |
| C             | -2.066853 | 2.267154  | 0.663192          | C  | -2.198737 | 2.229274  | 0.633309  |
| C             | 0.057297  | 2.465235  | -0.751446         | C  | -0.057010 | 2.526103  | -0.746054 |
| O             | -2.704741 | 3.029524  | 1.250712          | O  | -2.889839 | 2.947410  | 1.187332  |
| O             | 0.683394  | 3.359965  | -1.122807         | O  | 0.530782  | 3.436163  | -1.097533 |
| Co            | 0.878987  | -0.436019 | -0.518876         | Co | 0.839389  | -0.353239 | -0.611334 |
| C             | 2.645915  | -0.424761 | 0.298535          | C  | 2.638728  | -0.361865 | 0.206434  |
| C             | 2.958944  | 0.923763  | -0.386028         | C  | 2.921247  | 1.151671  | 0.269960  |
| C             | 4.522305  | 0.902115  | -0.474474         | C  | 4.477725  | 1.216807  | 0.308421  |
| C             | 4.898411  | -0.398926 | 0.261080          | C  | 4.891333  | -0.261360 | 0.259679  |
| C             | 3.778202  | -1.331184 | -0.219936         | C  | 3.815736  | -0.847477 | -0.661142 |
| C             | 4.554723  | -0.260394 | 1.760615          | C  | 4.532824  | -0.923483 | 1.599389  |
| C             | 2.993486  | -0.314807 | 1.784219          | C  | 2.978826  | -0.994185 | 1.558348  |
| H             | 2.526779  | 1.007239  | -1.401964         | H  | 2.552152  | 1.672502  | -0.618827 |
| H             | 2.588212  | 1.767855  | 0.201886          | H  | 2.450546  | 1.613021  | 1.137712  |
| H             | 4.856770  | 0.867546  | -1.517779         | H  | 4.866519  | 1.759081  | -0.555042 |
| H             | 4.959180  | 1.794092  | -0.010680         | H  | 4.842979  | 1.719365  | 1.205554  |
| H             | 4.945509  | 0.671803  | 2.185828          | H  | 4.903083  | -0.349658 | 2.450761  |
| H             | 4.986906  | -1.090017 | 2.332384          | H  | 4.969559  | -1.921717 | 1.664268  |
| H             | 2.546987  | 0.568709  | 2.249327          | H  | 2.510169  | -0.467540 | 2.386770  |

---

|   |           |           |           |   |           |           |           |
|---|-----------|-----------|-----------|---|-----------|-----------|-----------|
| H | 2.625932  | -1.189408 | 2.331584  | H | 2.629231  | -2.027082 | 1.593959  |
| H | 3.789306  | -2.315963 | 0.261272  | H | 3.872294  | -1.933616 | -0.743243 |
| H | 3.760204  | -1.464027 | -1.308658 | H | 3.812627  | -0.414966 | -1.663982 |
| H | 5.925614  | -0.728295 | 0.070683  | H | 5.925624  | -0.417471 | -0.046650 |
| C | 0.062485  | 0.130948  | 1.086181  | C | 0.114736  | 0.233753  | 1.052303  |
| C | 1.107822  | -2.128872 | -0.704140 | C | 1.229248  | -1.977411 | -1.005267 |
| O | 0.003175  | -0.005754 | 2.248225  | O | 0.124136  | 0.159090  | 2.206415  |
| O | 1.196642  | -3.283191 | -0.742913 | O | 1.417072  | -3.094288 | -1.170587 |
| C | -0.198591 | -0.182114 | -1.928443 | C | -0.270220 | -0.081946 | -1.990014 |
| O | -0.741617 | -0.047667 | -2.946116 | O | -0.814154 | 0.048733  | -2.991489 |

---

**Table S21.** Optimized coordinates for the (nor)<sub>2</sub>Co(CO)<sub>5</sub> structure **5S-b3**.

| B3PW91-D3/DZP |           |           | B3PW91-D3/cc-pVTZ |    |           |           |           |
|---------------|-----------|-----------|-------------------|----|-----------|-----------|-----------|
|               | x         | y         | z                 |    | x         | y         | z         |
| Co            | -1.439670 | 1.711325  | 0.306250          | Co | -1.377232 | 1.663970  | 0.411693  |
| C             | -2.104284 | -1.002380 | -0.479679         | C  | -2.262943 | -0.861988 | -0.423303 |
| C             | -3.505865 | -0.775079 | -1.092441         | C  | -3.301342 | -0.730941 | -1.559395 |
| C             | -4.380023 | -1.821655 | -0.339308         | C  | -4.549245 | -1.433128 | -0.962062 |
| C             | -3.386150 | -2.486441 | 0.633456          | C  | -4.065974 | -1.911944 | 0.414332  |
| C             | -2.460484 | -1.313698 | 0.987473          | C  | -3.144540 | -0.757495 | 0.831229  |
| C             | -2.432945 | -3.384884 | -0.178146         | C  | -3.059030 | -3.053290 | 0.210584  |
| C             | -1.584661 | -2.366454 | -0.990843         | C  | -1.806534 | -2.334185 | -0.351615 |
| H             | -3.858610 | 0.240271  | -0.892323         | H  | -3.504838 | 0.315348  | -1.785111 |
| H             | -3.495407 | -0.915738 | -2.178388         | H  | -2.933606 | -1.197554 | -2.472718 |
| H             | -5.191123 | -1.325886 | 0.206799          | H  | -5.375390 | -0.727660 | -0.858067 |
| H             | -4.836678 | -2.551893 | -1.017301         | H  | -4.900091 | -2.259796 | -1.581326 |
| H             | -2.978558 | -4.088850 | -0.817367         | H  | -3.445368 | -3.816584 | -0.466723 |
| H             | -1.790207 | -3.966850 | 0.492115          | H  | -2.828939 | -3.542869 | 1.158046  |
| H             | -1.720198 | -2.453760 | -2.073921         | H  | -1.492133 | -2.693330 | -1.330621 |
| H             | -0.520313 | -2.476953 | -0.777433         | H  | -0.956084 | -2.431568 | 0.318551  |
| H             | -1.578253 | -1.600271 | 1.570610          | H  | -2.585014 | -0.948915 | 1.748868  |
| H             | -2.971686 | -0.475184 | 1.482595          | H  | -3.671394 | 0.196074  | 0.918492  |
| H             | -3.861520 | -2.991557 | 1.480532          | H  | -4.872463 | -2.147786 | 1.107275  |
| C             | -1.116460 | 0.128355  | -0.646654         | C  | -1.119250 | 0.101339  | -0.561007 |
| O             | -0.130033 | 0.060216  | -1.427419         | O  | -0.183251 | -0.047142 | -1.371419 |
| C             | 3.909861  | -1.049139 | 0.981217          | C  | 4.015060  | -1.043291 | 0.872943  |
| C             | 2.740206  | -0.765947 | 0.014666          | C  | 2.859945  | -0.791710 | -0.116135 |
| C             | 3.040947  | 0.700856  | -0.415600         | C  | 3.075277  | 0.703731  | -0.465035 |
| C             | 4.459778  | 0.359650  | -0.919402         | C  | 4.525622  | 0.485742  | -0.931657 |
| C             | 4.162459  | -0.747326 | -1.948717         | C  | 4.341458  | -0.585622 | -2.015726 |
| C             | 5.092596  | -0.276758 | 0.332552          | C  | 5.157548  | -0.162799 | 0.307225  |
| C             | 2.971934  | -1.520398 | -1.313646         | C  | 3.188287  | -1.461952 | -1.464230 |
| H             | 3.058290  | 1.422555  | 0.412212          | H  | 3.016145  | 1.381289  | 0.390145  |
| H             | 2.407050  | 1.075261  | -1.229738         | H  | 2.438290  | 1.068726  | -1.272700 |
| H             | 2.073133  | -1.459434 | -1.937348         | H  | 2.313718  | -1.431102 | -2.115060 |
| H             | 3.180212  | -2.578024 | -1.124301         | H  | 3.455492  | -2.507520 | -1.317479 |
| H             | 4.079818  | -2.126092 | 1.074483          | H  | 4.253989  | -2.104858 | 0.920393  |
| H             | 3.678776  | -0.664638 | 1.981763          | H  | 3.727347  | -0.728038 | 1.877638  |
| H             | 5.035361  | -1.388147 | -2.118279         | H  | 5.256924  | -1.155878 | -2.180224 |
| H             | 3.875508  | -0.313269 | -2.913353         | H  | 4.063146  | -0.129143 | -2.966739 |
| H             | 5.025941  | 1.204238  | -1.324536         | H  | 5.042626  | 1.380312  | -1.275848 |
| H             | 5.474770  | 0.495918  | 1.009733          | H  | 5.459351  | 0.597088  | 1.029827  |



---

|    |           |           |           |    |           |           |           |
|----|-----------|-----------|-----------|----|-----------|-----------|-----------|
| H  | 5.929828  | -0.934924 | 0.073797  | H  | 6.044869  | -0.744241 | 0.052913  |
| C  | 0.137700  | 2.488165  | -0.165299 | C  | 0.254629  | 2.340579  | 0.092706  |
| C  | 1.388655  | -1.123128 | 0.620897  | C  | 1.533941  | -1.294296 | 0.441908  |
| O  | 0.696902  | 3.428030  | -0.583769 | O  | 0.933142  | 3.240084  | -0.179153 |
| O  | 1.094673  | -2.220922 | 1.029674  | O  | 1.330602  | -2.445106 | 0.695378  |
| C  | 0.349286  | 0.618491  | 2.114269  | C  | 0.458680  | 0.200016  | 2.171136  |
| O  | 0.154479  | 0.660604  | 3.257573  | O  | 0.312212  | 0.102278  | 3.304064  |
| O  | -3.617276 | 2.950855  | -1.134936 | O  | -3.389822 | 3.022739  | -1.144251 |
| C  | -2.797456 | 2.424221  | -0.503872 | C  | -2.655378 | 2.467140  | -0.461471 |
| Co | 0.568683  | 0.522906  | 0.410236  | Co | 0.591791  | 0.313428  | 0.457972  |

---

**Table S22.** Optimized coordinates for the (nor)<sub>2</sub>Co(CO)<sub>5</sub> structure **5S-b4**.

| B3PW91-D3/DZP |           |           | B3PW91-D3/cc-pVTZ |    |           |           |           |
|---------------|-----------|-----------|-------------------|----|-----------|-----------|-----------|
| x             | y         | z         | x                 | y  | z         |           |           |
| C             | 3.485074  | -1.392021 | 1.038260          | C  | 3.470289  | -1.432617 | 0.990813  |
| C             | 3.044336  | -0.290896 | 0.048937          | C  | 3.054741  | -0.290596 | 0.044004  |
| C             | 4.149851  | 0.764874  | 0.283279          | C  | 4.152618  | 0.747809  | 0.352952  |
| C             | 5.310853  | -0.193186 | -0.024058         | C  | 5.317724  | -0.194240 | 0.034244  |
| C             | 4.941493  | -0.677860 | -1.438351         | C  | 4.986064  | -0.613645 | -1.404046 |
| C             | 5.043261  | -1.327945 | 0.983879          | C  | 5.024856  | -1.369180 | 0.978481  |
| C             | 3.384216  | -0.748537 | -1.388742         | C  | 3.432362  | -0.684808 | -1.398448 |
| Co            | 1.081443  | 0.147470  | 0.140150          | Co | 1.090560  | 0.155748  | 0.108775  |
| H             | 4.181449  | 1.147373  | 1.310747          | H  | 4.154251  | 1.083038  | 1.391802  |
| H             | 4.095299  | 1.611616  | -0.412614         | H  | 4.115520  | 1.621286  | -0.301591 |
| H             | 2.930226  | -0.076655 | -2.125886         | H  | 3.000521  | 0.015009  | -2.115244 |
| H             | 3.007830  | -1.757942 | -1.593514         | H  | 3.062052  | -1.678441 | -1.655946 |
| H             | 3.098319  | -2.377254 | 0.752471          | H  | 3.090816  | -2.398765 | 0.654830  |
| H             | 3.113090  | -1.179154 | 2.047642          | H  | 3.075901  | -1.265145 | 1.994519  |
| H             | 5.396637  | -1.647339 | -1.673806         | H  | 5.445808  | -1.566949 | -1.670642 |
| H             | 5.278644  | 0.040039  | -2.195785         | H  | 5.341278  | 0.132723  | -2.117010 |
| H             | 6.316300  | 0.235317  | 0.049488          | H  | 6.316490  | 0.225964  | 0.151940  |
| H             | 5.462602  | -1.081514 | 1.966866          | H  | 5.417852  | -1.170679 | 1.977384  |
| H             | 5.489174  | -2.276729 | 0.662395          | H  | 5.476757  | -2.298796 | 0.628086  |
| C             | 1.611682  | 1.704615  | 0.836402          | C  | 1.602186  | 1.691071  | 0.870243  |
| C             | 0.778167  | -1.578185 | -0.260033         | C  | 0.794204  | -1.552298 | -0.367857 |
| O             | 1.915982  | 2.710183  | 1.303096          | O  | 1.891069  | 2.667437  | 1.373463  |
| O             | 0.540426  | -2.686278 | -0.462842         | O  | 0.569059  | -2.637890 | -0.621239 |
| Co            | -1.381170 | 0.653713  | -0.177394         | Co | -1.371054 | 0.656795  | -0.161253 |
| C             | -3.078516 | -0.179944 | 0.208672          | C  | -3.080479 | -0.185726 | 0.192240  |
| C             | -2.667641 | -1.329058 | -0.740499         | C  | -2.685430 | -1.375205 | -0.705552 |
| C             | -4.053860 | -1.877946 | -1.219298         | C  | -4.075054 | -1.934401 | -1.150093 |
| C             | -5.058709 | -1.076490 | -0.368078         | C  | -5.069892 | -1.069331 | -0.362183 |
| C             | -4.402662 | 0.312016  | -0.397934         | C  | -4.387283 | 0.298599  | -0.449992 |
| C             | -4.900040 | -1.463525 | 1.120275          | C  | -4.941755 | -1.382400 | 1.139534  |
| C             | -3.551800 | -0.787867 | 1.530086          | C  | -3.581495 | -0.730791 | 1.527369  |
| H             | -2.074604 | -0.981100 | -1.612618         | H  | -2.101594 | -1.072145 | -1.590950 |
| H             | -2.081115 | -2.093251 | -0.224031         | H  | -2.099222 | -2.113637 | -0.162343 |
| H             | -4.209945 | -1.681405 | -2.286355         | H  | -4.222239 | -1.808557 | -2.223813 |
| H             | -4.127961 | -2.960205 | -1.061766         | H  | -4.166780 | -2.997807 | -0.924114 |
| H             | -4.881599 | -2.551157 | 1.259375          | H  | -4.960688 | -2.455965 | 1.335617  |
| H             | -5.734779 | -1.069962 | 1.711920          | H  | -5.765889 | -0.934887 | 1.697359  |
| H             | -2.827046 | -1.498700 | 1.941771          | H  | -2.882489 | -1.441450 | 1.968691  |

---

|   |           |           |           |   |           |           |           |
|---|-----------|-----------|-----------|---|-----------|-----------|-----------|
| H | -3.706570 | -0.005697 | 2.281393  | H | -3.716404 | 0.079072  | 2.245123  |
| H | -4.906049 | 1.055702  | 0.230627  | H | -4.880995 | 1.077425  | 0.133214  |
| H | -4.295311 | 0.713092  | -1.412703 | H | -4.260655 | 0.648338  | -1.476031 |
| H | -6.089507 | -1.139436 | -0.733450 | H | -6.091274 | -1.128887 | -0.737944 |
| C | -0.807424 | 0.334718  | 1.455772  | C | -0.792984 | 0.251786  | 1.457231  |
| C | -2.165515 | 2.159558  | -0.569723 | C | -2.184579 | 2.146395  | -0.554603 |
| O | -0.654864 | 0.285559  | 2.612013  | O | -0.622253 | 0.145279  | 2.592191  |
| O | -2.662595 | 3.197853  | -0.692975 | O | -2.693383 | 3.162881  | -0.680404 |
| C | 0.102480  | 0.946675  | -1.307184 | C | 0.090769  | 1.005171  | -1.298358 |
| O | 0.569309  | 1.261238  | -2.337610 | O | 0.538403  | 1.356924  | -2.309253 |

---

**Table S23.** Optimized coordinates for the (nor)<sub>2</sub>Co(CO)<sub>5</sub> structure **5T-b5**.

| B3PW91-D3/DZP |           |           | B3PW91-D3/cc-pVTZ |    |           |           |           |
|---------------|-----------|-----------|-------------------|----|-----------|-----------|-----------|
| x             | y         | z         | x                 | y  | z         |           |           |
| C             | -1.543573 | 1.617759  | -1.622840         | C  | -1.585488 | 1.656006  | -1.600737 |
| C             | -1.424121 | 1.046606  | -0.169071         | C  | -1.469686 | 1.048568  | -0.167181 |
| C             | -0.728132 | 2.232047  | 0.544101          | C  | -0.782364 | 2.214287  | 0.575798  |
| C             | -1.757748 | 3.297340  | 0.115958          | C  | -1.814698 | 3.282634  | 0.175799  |
| C             | -3.071288 | 2.697142  | 0.635819          | C  | -3.120164 | 2.662834  | 0.676941  |
| C             | -1.720374 | 3.157533  | -1.411550         | C  | -1.776322 | 3.183701  | -1.349286 |
| C             | -2.857929 | 1.166212  | 0.425149          | C  | -2.899003 | 1.142604  | 0.428885  |
| Co            | 0.324771  | -0.261332 | 1.058954          | Co | 0.353654  | -0.307055 | 1.052942  |
| H             | 0.270350  | 2.450070  | 0.160208          | H  | 0.211391  | 2.442874  | 0.200294  |
| H             | -0.673199 | 2.136592  | 1.637719          | H  | -0.727380 | 2.086007  | 1.660441  |
| H             | -2.953438 | 0.633688  | 1.375256          | H  | -2.988257 | 0.588952  | 1.361533  |
| H             | -3.606067 | 0.734797  | -0.251252         | H  | -3.640501 | 0.723158  | -0.253993 |
| H             | -2.402458 | 1.185750  | -2.154443         | H  | -2.429877 | 1.228390  | -2.147568 |
| H             | -0.657857 | 1.421652  | -2.232871         | H  | -0.695803 | 1.481981  | -2.203000 |
| H             | -3.943508 | 3.082082  | 0.094430          | H  | -3.991167 | 3.053692  | 0.148261  |
| H             | -3.212877 | 2.929634  | 1.698493          | H  | -3.264507 | 2.866422  | 1.739989  |
| H             | -1.556207 | 4.313028  | 0.473904          | H  | -1.621589 | 4.284924  | 0.558599  |
| H             | -0.865968 | 3.703161  | -1.831275         | H  | -0.932058 | 3.746092  | -1.753714 |
| H             | -2.629095 | 3.544124  | -1.887325         | H  | -2.684090 | 3.572216  | -1.813622 |
| C             | -0.987542 | -0.630457 | 2.232765          | C  | -0.971986 | -0.696458 | 2.201492  |
| O             | -1.757509 | -0.915769 | 3.040905          | O  | -1.752596 | -0.980740 | 2.979874  |
| Co            | -1.188859 | -0.910238 | -0.803042         | Co | -1.191891 | -0.898717 | -0.796206 |
| C             | 2.013242  | 0.269303  | -0.003950         | C  | 2.025288  | 0.274972  | -0.002840 |
| C             | 1.766898  | 0.536706  | -1.504652         | C  | 1.772014  | 0.541924  | -1.497601 |
| C             | 3.187928  | 0.485872  | -2.142969         | C  | 3.190961  | 0.532944  | -2.134015 |
| C             | 4.093685  | 0.168795  | -0.940599         | C  | 4.101788  | 0.240389  | -0.936215 |
| C             | 3.184585  | -0.736934 | -0.097244         | C  | 3.222919  | -0.692644 | -0.097601 |
| C             | 4.182572  | 1.420839  | -0.054221         | C  | 4.152466  | 1.487863  | -0.050355 |
| C             | 2.744591  | 1.531038  | 0.539413          | C  | 2.717261  | 1.551969  | 0.545063  |
| H             | 1.132337  | -0.241373 | -1.942586         | H  | 1.162639  | -0.246544 | -1.938543 |
| H             | 1.268488  | 1.496231  | -1.667958         | H  | 1.247489  | 1.482452  | -1.654302 |
| H             | 3.247647  | -0.307833 | -2.897569         | H  | 3.272173  | -0.253207 | -2.887139 |
| H             | 3.464614  | 1.427912  | -2.631809         | H  | 3.439415  | 1.478302  | -2.620043 |
| H             | 4.476521  | 2.312922  | -0.620545         | H  | 4.417001  | 2.386160  | -0.611411 |
| H             | 4.921415  | 1.276299  | 0.743689          | H  | 4.893583  | 1.366507  | 0.742350  |
| H             | 2.244753  | 2.452541  | 0.222239          | H  | 2.189883  | 2.454187  | 0.236026  |
| H             | 2.781414  | 1.559385  | 1.633100          | H  | 2.755043  | 1.574572  | 1.633436  |
| H             | 3.628527  | -0.994031 | 0.871350          | H  | 3.669156  | -0.936986 | 0.867405  |

---

|   |           |           |           |   |           |           |           |
|---|-----------|-----------|-----------|---|-----------|-----------|-----------|
| H | 2.907552  | -1.665806 | -0.607790 | H | 2.974969  | -1.623894 | -0.607878 |
| H | 5.067281  | -0.251503 | -1.215666 | H | 5.082939  | -0.146884 | -1.211367 |
| C | 1.514909  | -0.441988 | 2.296050  | C | 1.531444  | -0.447153 | 2.307368  |
| O | 2.294145  | -0.617360 | 3.131982  | O | 2.300294  | -0.601082 | 3.138455  |
| C | -2.591106 | -1.976193 | -0.198255 | C | -2.564024 | -2.023770 | -0.207844 |
| O | -3.456396 | -2.593090 | 0.242017  | O | -3.397897 | -2.668501 | 0.215065  |
| C | -0.862971 | -1.729368 | -2.433374 | C | -0.847405 | -1.686444 | -2.447780 |
| O | -0.623302 | -2.263730 | -3.423977 | O | -0.602595 | -2.180510 | -3.440998 |
| C | 0.261168  | -1.912893 | 0.172026  | C | 0.313990  | -1.929655 | 0.135959  |
| O | 0.791986  | -2.955437 | 0.237293  | O | 0.841544  | -2.959286 | 0.143514  |

---

**Table S24.** Optimized coordinates for the (nor)<sub>2</sub>Co(CO)<sub>5</sub> structure **5S-b6**.

| B3PW91-D3/DZP |           |           | B3PW91-D3/cc-pVTZ |    |           |           |           |
|---------------|-----------|-----------|-------------------|----|-----------|-----------|-----------|
| x             | y         | z         | x                 | y  | z         |           |           |
| C             | -2.312362 | 0.955486  | 1.860680          | C  | -2.295476 | 0.851203  | 1.893250  |
| C             | -1.773625 | 0.162230  | 0.646046          | C  | -1.772934 | 0.097150  | 0.650747  |
| C             | -1.224688 | -1.075671 | 1.411094          | C  | -1.216427 | -1.161772 | 1.369068  |
| C             | -2.576585 | -1.459358 | 2.038194          | C  | -2.555767 | -1.558930 | 2.007011  |
| C             | -3.471987 | -1.599795 | 0.799905          | C  | -3.468655 | -1.661186 | 0.785209  |
| C             | -2.927245 | -0.148616 | 2.775861          | C  | -2.889041 | -0.275649 | 2.786247  |
| C             | -3.012623 | -0.409241 | -0.085186         | C  | -3.020292 | -0.454124 | -0.074741 |
| Co            | 0.324746  | -1.138627 | -0.581538         | Co | 0.343888  | -1.103725 | -0.628106 |
| H             | -0.484178 | -0.819190 | 2.168874          | H  | -0.466097 | -0.930485 | 2.117825  |
| H             | -0.822919 | -1.928430 | 0.818119          | H  | -0.831715 | -1.990050 | 0.743607  |
| H             | -2.773923 | -0.723472 | -1.104836         | H  | -2.800209 | -0.743571 | -1.100078 |
| H             | -3.789430 | 0.357697  | -0.175555         | H  | -3.792723 | 0.312856  | -0.136617 |
| H             | -3.048190 | 1.708783  | 1.559317          | H  | -3.035025 | 1.605629  | 1.624416  |
| H             | -1.501211 | 1.485628  | 2.374015          | H  | -1.482915 | 1.369269  | 2.405254  |
| H             | -4.538392 | -1.561789 | 1.050175          | H  | -4.525970 | -1.626373 | 1.051972  |
| H             | -3.284222 | -2.558461 | 0.299066          | H  | -3.295481 | -2.603131 | 0.258892  |
| H             | -2.560781 | -2.344013 | 2.684151          | H  | -2.531019 | -2.457940 | 2.622830  |
| H             | -2.480243 | -0.132658 | 3.776946          | H  | -2.422507 | -0.288492 | 3.772748  |
| H             | -4.010846 | -0.033991 | 2.896359          | H  | -3.964337 | -0.164209 | 2.935118  |
| C             | -0.836203 | -2.117090 | -1.560704         | C  | -0.810092 | -2.025099 | -1.668583 |
| O             | -1.473140 | -2.827710 | -2.204919         | O  | -1.438404 | -2.680346 | -2.353829 |
| Co            | -0.474877 | 1.283287  | -0.456037         | Co | -0.513979 | 1.289797  | -0.433023 |
| C             | 1.761125  | -0.305014 | 0.585767          | C  | 1.774498  | -0.310242 | 0.576796  |
| C             | 1.299946  | 0.911358  | 1.445505          | C  | 1.299751  | 0.872130  | 1.464206  |
| C             | 2.594682  | 1.735691  | 1.682212          | C  | 2.585572  | 1.691500  | 1.741285  |
| C             | 3.682793  | 0.796654  | 1.145081          | C  | 3.679612  | 0.787725  | 1.171937  |
| C             | 3.003376  | 0.266148  | -0.125904         | C  | 3.007795  | 0.295414  | -0.113289 |
| C             | 3.724558  | -0.461999 | 2.035669          | C  | 3.737107  | -0.495516 | 2.014693  |
| C             | 2.438596  | -1.244313 | 1.615286          | C  | 2.458544  | -1.270891 | 1.577108  |
| H             | 0.519882  | 1.598789  | 1.026863          | H  | 0.531886  | 1.558950  | 1.038896  |
| H             | 0.848337  | 0.580843  | 2.384435          | H  | 0.832803  | 0.516686  | 2.379856  |
| H             | 2.576369  | 2.668757  | 1.105222          | H  | 2.561651  | 2.644397  | 1.208263  |
| H             | 2.732222  | 1.997471  | 2.737886          | H  | 2.717108  | 1.908583  | 2.802551  |
| H             | 3.736427  | -0.205873 | 3.102090          | H  | 3.755372  | -0.279137 | 3.084499  |
| H             | 4.623112  | -1.055589 | 1.830738          | H  | 4.634766  | -1.071848 | 1.784950  |
| H             | 1.780113  | -1.470881 | 2.462266          | H  | 1.804768  | -1.520469 | 2.414353  |
| H             | 2.714853  | -2.203701 | 1.167471          | H  | 2.737243  | -2.212745 | 1.107302  |
| H             | 3.589505  | -0.506054 | -0.636843         | H  | 3.597388  | -0.449277 | -0.649812 |

---

|   |           |           |           |   |           |           |           |
|---|-----------|-----------|-----------|---|-----------|-----------|-----------|
| H | 2.765330  | 1.052367  | -0.851235 | H | 2.760922  | 1.100733  | -0.806521 |
| H | 4.655763  | 1.280436  | 1.008540  | H | 4.642141  | 1.284600  | 1.052985  |
| C | 1.583453  | -2.266583 | -0.980569 | C | 1.593844  | -2.242050 | -1.032450 |
| O | 2.445087  | -2.942778 | -1.353491 | O | 2.442803  | -2.913320 | -1.399806 |
| C | -1.893202 | 2.232971  | -0.756248 | C | -1.953375 | 2.225307  | -0.687136 |
| O | -2.841575 | 2.824351  | -1.059389 | O | -2.900013 | 2.806462  | -0.961168 |
| C | 0.581349  | 2.569075  | -1.099802 | C | 0.503247  | 2.627113  | -1.019574 |
| O | 1.225873  | 3.453136  | -1.462752 | O | 1.127601  | 3.525997  | -1.335291 |
| C | 0.184209  | 0.198933  | -1.884478 | C | 0.246674  | 0.281621  | -1.878303 |
| O | 0.375326  | 0.300791  | -3.039448 | O | 0.485122  | 0.432437  | -3.005367 |

---

**Table S25.**Optimized coordinates for the (nor)<sub>2</sub>Co(CO)<sub>5</sub> structure **5T-b7**.

| B3PW91-D3/DZP |           |           | B3PW91-D3/cc-pVTZ |    |           |           |           |
|---------------|-----------|-----------|-------------------|----|-----------|-----------|-----------|
|               | x         | y         | z                 |    | x         | y         | z         |
| C             | 3.347111  | -0.263524 | -1.551545         | C  | 3.330077  | -0.273894 | -1.547766 |
| C             | 2.555480  | -0.169697 | -0.234411         | C  | 2.567798  | -0.173955 | -0.216284 |
| C             | 2.312448  | -1.660827 | 0.066223          | C  | 2.306011  | -1.660198 | 0.075541  |
| C             | 3.800918  | -2.036818 | 0.035281          | C  | 3.781580  | -2.065190 | 0.007835  |
| C             | 4.376942  | -1.075830 | 1.094968          | C  | 4.400557  | -1.129144 | 1.056833  |
| C             | 4.209105  | -1.548820 | -1.367612         | C  | 4.166763  | -1.574147 | -1.394031 |
| C             | 3.532879  | 0.225446  | 0.898846          | C  | 3.579830  | 0.184569  | 0.893176  |
| Co            | 1.063755  | 1.112697  | 0.040829          | Co | 1.062939  | 1.119129  | 0.037298  |
| H             | 1.722087  | -2.160907 | -0.710254         | H  | 1.692537  | -2.140212 | -0.688078 |
| H             | 1.844024  | -1.838455 | 1.039766          | H  | 1.858020  | -1.838435 | 1.052897  |
| H             | 3.011957  | 0.487123  | 1.830367          | H  | 3.084963  | 0.447501  | 1.831197  |
| H             | 4.145363  | 1.089251  | 0.616755          | H  | 4.198882  | 1.036256  | 0.608002  |
| H             | 3.963850  | 0.624234  | -1.727863         | H  | 3.956521  | 0.599490  | -1.728786 |
| H             | 2.659736  | -0.359122 | -2.399966         | H  | 2.629347  | -0.348059 | -2.380426 |
| H             | 5.449425  | -0.896836 | 0.953954          | H  | 5.468084  | -0.973143 | 0.892667  |
| H             | 4.236286  | -1.482153 | 2.103520          | H  | 4.278577  | -1.539899 | 2.060620  |
| H             | 4.033157  | -3.090516 | 0.224901          | H  | 3.994893  | -3.119940 | 0.181532  |
| H             | 3.964047  | -2.301967 | -2.125961         | H  | 3.891702  | -2.311122 | -2.150666 |
| H             | 5.284799  | -1.347887 | -1.436986         | H  | 5.239550  | -1.396148 | -1.486371 |
| C             | 2.061197  | 2.221700  | -0.872327         | C  | 2.136041  | 2.237932  | -0.774701 |
| C             | -0.041095 | 2.443357  | 0.585265          | C  | -0.071230 | 2.453339  | 0.499517  |
| O             | 2.642733  | 2.959374  | -1.542728         | O  | 2.773282  | 2.972933  | -1.369168 |
| O             | -0.659528 | 3.351676  | 0.927514          | O  | -0.705573 | 3.354891  | 0.777750  |
| Co            | -0.907085 | -0.404900 | 0.595414          | Co | -0.914410 | -0.380007 | 0.588619  |
| C             | -2.747119 | -0.260388 | -0.124820         | C  | -2.771860 | -0.248381 | -0.107838 |
| C             | -3.189297 | 1.220460  | -0.079503         | C  | -3.242384 | 1.219985  | -0.077718 |
| C             | -4.749427 | 1.134084  | -0.006149         | C  | -4.796806 | 1.106697  | -0.008302 |
| C             | -5.012408 | -0.384049 | 0.009524          | C  | -5.032030 | -0.409809 | 0.015053  |
| C             | -3.798498 | -0.904975 | 0.808931          | C  | -3.816494 | -0.902665 | 0.820654  |
| C             | -4.715661 | -0.945020 | -1.393455         | C  | -4.720282 | -0.970723 | -1.378224 |
| C             | -3.160852 | -0.839210 | -1.488260         | C  | -3.171440 | -0.840746 | -1.466388 |
| H             | -2.804070 | 1.732014  | 0.811881          | H  | -2.869065 | 1.744515  | 0.804325  |
| H             | -2.828145 | 1.776416  | -0.952991         | H  | -2.891669 | 1.772456  | -0.951196 |
| H             | -5.125394 | 1.607952  | 0.908961          | H  | -5.181616 | 1.576857  | 0.898986  |
| H             | -5.237415 | 1.624618  | -0.857001         | H  | -5.289755 | 1.583418  | -0.857565 |
| H             | -5.229316 | -0.376623 | -2.178275         | H  | -5.237103 | -0.418873 | -2.165662 |
| H             | -5.045889 | -1.988365 | -1.472559         | H  | -5.031592 | -2.014804 | -1.454115 |
| H             | -2.825452 | -0.200737 | -2.312535         | H  | -2.844106 | -0.205237 | -2.289640 |



---

|   |           |           |           |   |           |           |           |
|---|-----------|-----------|-----------|---|-----------|-----------|-----------|
| H | -2.712661 | -1.826576 | -1.651182 | H | -2.709816 | -1.817392 | -1.622666 |
| H | -3.741764 | -2.000733 | 0.834237  | H | -3.740504 | -1.991849 | 0.854215  |
| H | -3.765962 | -0.523580 | 1.838548  | H | -3.794480 | -0.516478 | 1.842957  |
| H | -5.998630 | -0.658599 | 0.401491  | H | -6.010570 | -0.697881 | 0.401134  |
| C | -0.000925 | 0.098526  | -1.101281 | C | 0.011566  | 0.102376  | -1.120271 |
| C | -0.823304 | -2.222705 | 0.329440  | C | -0.824819 | -2.211296 | 0.363110  |
| O | -0.088929 | -0.101650 | -2.250638 | O | -0.075571 | -0.107203 | -2.252538 |
| O | -1.003180 | -3.341133 | 0.118245  | O | -0.988096 | -3.322685 | 0.184217  |
| C | 0.086800  | -0.087945 | 2.105778  | C | 0.116338  | -0.052939 | 2.076246  |
| O | 0.671920  | 0.049021  | 3.096765  | O | 0.696159  | 0.084790  | 3.053268  |

---

**Table S26.** Harmonic vibrational frequencies (in  $\text{cm}^{-1}$ ) and infrared intensities (in parentheses, in  $\text{km/mol}$ ) for the  $(\text{nor})_2\text{Co}_2(\text{CO})_5$  structure **5T-1**

| B3PW91  |          |            |
|---------|----------|------------|
| -9(0)   | 763(35)  | 1301(1)    |
| 16(1)   | 773(3)   | 1305(5)    |
| 27(1)   | 776(9)   | 1310(6)    |
| 29(1)   | 801(3)   | 1327(8)    |
| 44(0)   | 806(3)   | 1328(9)    |
| 48(0)   | 823(14)  | 1337(1)    |
| 57(1)   | 824(24)  | 1338(0)    |
| 68(0)   | 833(1)   | 1343(0)    |
| 73(0)   | 834(3)   | 1348(3)    |
| 78(0)   | 879(22)  | 1466(103)  |
| 84(0)   | 883(19)  | 1471(3)    |
| 100(2)  | 940(1)   | 1473(0)    |
| 109(1)  | 942(2)   | 1488(8)    |
| 123(1)  | 947(4)   | 1489(2)    |
| 142(1)  | 951(10)  | 1489(2)    |
| 149(4)  | 955(0)   | 1490(7)    |
| 161(1)  | 955(2)   | 1495(9)    |
| 175(0)  | 975(2)   | 1495(6)    |
| 200(1)  | 977(4)   | 1523(1)    |
| 222(0)  | 986(5)   | 1523(1)    |
| 238(3)  | 989(15)  | 1766(543)  |
| 268(4)  | 1017(2)  | 2042(754)  |
| 288(23) | 1023(7)  | 2077(1645) |
| 299(4)  | 1033(4)  | 2107(532)  |
| 343(2)  | 1034(4)  | 3035(35)   |
| 349(0)  | 1061(7)  | 3071(54)   |
| 356(1)  | 1062(1)  | 3072(14)   |
| 398(20) | 1099(10) | 3074(34)   |
| 402(4)  | 1109(41) | 3076(28)   |
| 407(0)  | 1137(1)  | 3078(32)   |
| 421(31) | 1139(1)  | 3081(38)   |
| 437(7)  | 1162(49) | 3086(25)   |
| 444(1)  | 1175(49) | 3086(27)   |
| 453(3)  | 1184(0)  | 3090(25)   |
| 460(19) | 1186(15) | 3112(6)    |
| 472(4)  | 1215(13) | 3119(11)   |
| 475(1)  | 1216(2)  | 3120(23)   |
| 496(43) | 1247(1)  | 3121(32)   |

---

|         |         |          |
|---------|---------|----------|
| 503(5)  | 1248(6) | 3124(26) |
| 532(23) | 1250(7) | 3125(21) |
| 546(5)  | 1253(2) | 3134(24) |
| 550(2)  | 1262(9) | 3138(27) |
| 553(3)  | 1267(7) | 3145(21) |
| 596(73) | 1271(1) | 3147(41) |
| 661(3)  | 1275(5) | 3149(12) |
| 761(79) | 1300(4) | 3149(41) |

---

**Table S27.** Harmonic vibrational frequencies (in  $\text{cm}^{-1}$ ) and infrared intensities (in parentheses, in  $\text{km}/\text{mol}$ ) for the  $(\text{nor})_2\text{Co}_2(\text{CO})_5$  structure **5S-2**

| B3PW91  |          |            |
|---------|----------|------------|
| 18(0)   | 606(48)  | 1289(24)   |
| 33(1)   | 756(1)   | 1300(1)    |
| 43(1)   | 762(0)   | 1303(7)    |
| 53(0)   | 768(24)  | 1317(19)   |
| 66(0)   | 769(23)  | 1320(9)    |
| 71(0)   | 804(0)   | 1326(3)    |
| 75(1)   | 808(3)   | 1334(5)    |
| 81(0)   | 817(1)   | 1341(1)    |
| 93(1)   | 829(1)   | 1342(0)    |
| 97(0)   | 847(2)   | 1462(1)    |
| 107(0)  | 853(3)   | 1473(1)    |
| 114(1)  | 909(3)   | 1481(5)    |
| 117(7)  | 912(2)   | 1484(5)    |
| 119(1)  | 927(8)   | 1488(3)    |
| 132(0)  | 937(6)   | 1490(2)    |
| 167(1)  | 946(2)   | 1491(5)    |
| 182(0)  | 954(0)   | 1495(13)   |
| 197(1)  | 957(4)   | 1520(2)    |
| 206(2)  | 958(3)   | 1520(1)    |
| 213(17) | 968(5)   | 1959(463)  |
| 229(1)  | 976(1)   | 2037(456)  |
| 256(1)  | 996(18)  | 2084(859)  |
| 265(3)  | 1002(18) | 2089(1360) |
| 279(1)  | 1011(19) | 2129(417)  |
| 356(1)  | 1012(2)  | 2968(27)   |
| 359(1)  | 1024(18) | 3065(26)   |
| 362(9)  | 1032(0)  | 3068(39)   |
| 404(2)  | 1061(2)  | 3071(51)   |
| 405(11) | 1062(3)  | 3072(15)   |
| 417(11) | 1114(7)  | 3075(38)   |
| 423(26) | 1116(1)  | 3076(49)   |
| 427(6)  | 1135(3)  | 3082(24)   |
| 437(5)  | 1144(0)  | 3087(23)   |
| 457(1)  | 1177(27) | 3091(20)   |
| 462(3)  | 1178(3)  | 3111(7)    |
| 470(2)  | 1204(1)  | 3115(48)   |
| 484(39) | 1207(1)  | 3118(60)   |
| 490(11) | 1226(25) | 3119(19)   |

---

|          |          |          |
|----------|----------|----------|
| 494(9)   | 1241(11) | 3122(12) |
| 497(13)  | 1245(6)  | 3126(18) |
| 522(55)  | 1251(10) | 3133(25) |
| 541(6)   | 1252(5)  | 3135(14) |
| 547(9)   | 1265(9)  | 3142(21) |
| 564(141) | 1268(6)  | 3142(29) |
| 582(52)  | 1280(1)  | 3145(30) |
| 597(24)  | 1282(25) | 3152(33) |

---

**Table S28.** Harmonic vibrational frequencies (in  $\text{cm}^{-1}$ ) and infrared intensities (in parentheses, in  $\text{km/mol}$ ) for the  $(\text{nor})_2\text{Co}_2(\text{CO})_5$  structure **5S-3**

| B3PW91 |          |            |
|--------|----------|------------|
| 9(0)   | 762(59)  | 1298(1)    |
| 13(0)  | 768(5)   | 1299(1)    |
| 28(2)  | 769(1)   | 1300(4)    |
| 37(1)  | 804(12)  | 1325(10)   |
| 50(0)  | 805(2)   | 1328(6)    |
| 60(0)  | 806(17)  | 1337(0)    |
| 77(1)  | 825(18)  | 1342(2)    |
| 83(0)  | 831(2)   | 1342(1)    |
| 84(1)  | 837(3)   | 1345(0)    |
| 93(1)  | 878(20)  | 1472(1)    |
| 105(4) | 881(17)  | 1473(1)    |
| 115(0) | 941(0)   | 1484(2)    |
| 130(7) | 942(1)   | 1488(3)    |
| 137(0) | 955(15)  | 1490(9)    |
| 153(3) | 956(2)   | 1492(2)    |
| 158(2) | 957(0)   | 1494(17)   |
| 176(0) | 959(0)   | 1495(11)   |
| 196(1) | 976(4)   | 1519(26)   |
| 198(2) | 976(2)   | 1524(2)    |
| 238(3) | 987(52)  | 1530(100)  |
| 277(1) | 993(16)  | 1812(587)  |
| 282(2) | 1018(5)  | 1975(1011) |
| 306(7) | 1022(0)  | 2060(1550) |
| 321(1) | 1037(11) | 2090(632)  |
| 353(2) | 1042(3)  | 3049(24)   |
| 355(0) | 1058(2)  | 3055(14)   |
| 382(1) | 1058(1)  | 3074(29)   |
| 407(0) | 1086(15) | 3075(47)   |
| 409(3) | 1106(8)  | 3076(23)   |
| 421(1) | 1140(31) | 3077(27)   |
| 436(4) | 1140(34) | 3085(41)   |
| 451(4) | 1153(3)  | 3089(22)   |
| 455(0) | 1158(43) | 3096(25)   |
| 459(1) | 1184(3)  | 3101(26)   |
| 471(2) | 1186(1)  | 3122(2)    |
| 494(6) | 1210(0)  | 3124(20)   |
| 519(6) | 1212(4)  | 3125(9)    |
| 526(4) | 1239(2)  | 3127(23)   |

---

|         |          |          |
|---------|----------|----------|
| 541(19) | 1243(2)  | 3127(31) |
| 546(0)  | 1248(3)  | 3130(11) |
| 547(0)  | 1252(3)  | 3134(20) |
| 554(37) | 1265(18) | 3134(34) |
| 557(8)  | 1270(8)  | 3147(10) |
| 624(94) | 1274(6)  | 3153(34) |
| 667(8)  | 1276(1)  | 3157(25) |
| 738(97) | 1297(2)  | 3182(7)  |

---

**Table S29.** Harmonic vibrational frequencies (in  $\text{cm}^{-1}$ ) and infrared intensities (in parentheses, in  $\text{km/mol}$ ) for the  $(\text{nor})_2\text{Co}_2(\text{CO})_5$  structure **5S-4**

| B3PW91  |          |            |
|---------|----------|------------|
| -19(0)  | 638(203) | 1284(12)   |
| 20(0)   | 752(1)   | 1299(1)    |
| 27(0)   | 762(1)   | 1302(5)    |
| 41(0)   | 767(13)  | 1316(15)   |
| 50(0)   | 772(12)  | 1320(10)   |
| 62(1)   | 801(1)   | 1325(3)    |
| 66(1)   | 807(5)   | 1331(2)    |
| 75(0)   | 814(1)   | 1339(1)    |
| 83(1)   | 828(2)   | 1343(0)    |
| 93(0)   | 844(3)   | 1456(1)    |
| 98(2)   | 856(1)   | 1472(0)    |
| 105(1)  | 904(3)   | 1480(4)    |
| 108(0)  | 916(3)   | 1487(2)    |
| 125(2)  | 926(6)   | 1487(4)    |
| 140(0)  | 935(1)   | 1490(4)    |
| 156(0)  | 945(2)   | 1492(5)    |
| 179(2)  | 952(0)   | 1493(6)    |
| 190(0)  | 953(5)   | 1520(1)    |
| 192(1)  | 963(6)   | 1520(1)    |
| 205(0)  | 964(1)   | 1950(421)  |
| 225(7)  | 978(1)   | 2008(582)  |
| 232(0)  | 993(13)  | 2089(538)  |
| 279(14) | 1002(22) | 2091(1491) |
| 312(2)  | 1012(13) | 2154(158)  |
| 353(2)  | 1014(0)  | 2937(23)   |
| 357(1)  | 1029(21) | 3063(26)   |
| 366(34) | 1029(8)  | 3065(30)   |
| 369(0)  | 1058(0)  | 3066(28)   |
| 399(11) | 1061(3)  | 3071(36)   |
| 408(1)  | 1115(3)  | 3074(25)   |
| 411(6)  | 1115(3)  | 3075(55)   |
| 425(7)  | 1132(6)  | 3076(24)   |
| 432(9)  | 1146(0)  | 3077(33)   |
| 447(24) | 1176(29) | 3083(29)   |
| 466(0)  | 1178(7)  | 3110(3)    |
| 466(2)  | 1204(0)  | 3114(12)   |
| 482(0)  | 1206(1)  | 3117(50)   |
| 491(3)  | 1223(20) | 3119(61)   |



---

|          |          |          |
|----------|----------|----------|
| 512(14)  | 1241(6)  | 3121(27) |
| 525(1)   | 1248(9)  | 3127(1)  |
| 537(6)   | 1251(14) | 3128(10) |
| 539(61)  | 1252(4)  | 3132(41) |
| 549(5)   | 1256(9)  | 3136(43) |
| 556(136) | 1268(12) | 3136(13) |
| 583(40)  | 1276(1)  | 3142(38) |
| 586(141) | 1283(28) | 3146(36) |

---

**Table S30.** Harmonic vibrational frequencies (in  $\text{cm}^{-1}$ ) and infrared intensities (in parentheses, in  $\text{km/mol}$ ) for the  $(\text{nor})_2\text{Co}_2(\text{CO})_5$  structure **5T-5**

| B3PW91  |          |            |
|---------|----------|------------|
| 31(0)   | 598(55)  | 1281(13)   |
| 39(1)   | 755(13)  | 1292(0)    |
| 44(0)   | 759(8)   | 1296(2)    |
| 56(1)   | 760(4)   | 1310(12)   |
| 60(0)   | 770(7)   | 1316(9)    |
| 65(0)   | 797(1)   | 1330(3)    |
| 67(0)   | 802(2)   | 1333(1)    |
| 70(0)   | 831(1)   | 1341(0)    |
| 74(0)   | 834(1)   | 1348(0)    |
| 80(1)   | 840(3)   | 1464(1)    |
| 94(2)   | 854(2)   | 1472(0)    |
| 96(0)   | 898(1)   | 1480(4)    |
| 101(0)  | 915(4)   | 1485(5)    |
| 115(1)  | 925(2)   | 1489(1)    |
| 121(0)  | 936(2)   | 1491(8)    |
| 131(2)  | 938(1)   | 1494(6)    |
| 156(0)  | 949(0)   | 1495(3)    |
| 171(4)  | 952(0)   | 1519(1)    |
| 187(1)  | 958(4)   | 1521(1)    |
| 208(1)  | 960(3)   | 1952(590)  |
| 218(2)  | 963(1)   | 2080(358)  |
| 223(4)  | 993(5)   | 2094(829)  |
| 241(1)  | 1001(13) | 2107(1592) |
| 243(2)  | 1007(0)  | 2145(721)  |
| 316(2)  | 1013(2)  | 3056(12)   |
| 333(7)  | 1015(2)  | 3058(13)   |
| 343(4)  | 1027(0)  | 3063(54)   |
| 352(3)  | 1044(0)  | 3065(38)   |
| 362(1)  | 1049(1)  | 3066(34)   |
| 390(20) | 1101(2)  | 3069(41)   |
| 401(12) | 1115(1)  | 3074(38)   |
| 415(26) | 1145(0)  | 3076(36)   |
| 420(0)  | 1152(1)  | 3083(24)   |
| 428(0)  | 1164(6)  | 3086(22)   |
| 432(1)  | 1174(9)  | 3112(3)    |
| 444(2)  | 1192(0)  | 3114(40)   |
| 450(5)  | 1203(0)  | 3117(17)   |
| 456(2)  | 1235(3)  | 3118(49)   |

---

|         |          |          |
|---------|----------|----------|
| 466(4)  | 1238(9)  | 3119(34) |
| 479(6)  | 1239(6)  | 3121(22) |
| 486(16) | 1247(4)  | 3135(11) |
| 496(23) | 1251(2)  | 3139(25) |
| 547(0)  | 1261(5)  | 3143(40) |
| 548(1)  | 1270(4)  | 3144(17) |
| 563(4)  | 1276(1)  | 3146(36) |
| 579(50) | 1280(18) | 3167(13) |

---

**Table S31.** Harmonic vibrational frequencies (in  $\text{cm}^{-1}$ ) and infrared intensities (in parentheses, in  $\text{km}/\text{mol}$ ) for the  $(\text{nor})_2\text{Co}_2(\text{CO})_5$  structure **5S-6**

| B3PW91  |         |            |
|---------|---------|------------|
| 20(0)   | 614(54) | 1292(1)    |
| 52(0)   | 751(1)  | 1299(0)    |
| 55(0)   | 756(1)  | 1313(2)    |
| 72(0)   | 756(11) | 1318(9)    |
| 77(0)   | 761(11) | 1320(4)    |
| 83(0)   | 802(3)  | 1336(0)    |
| 87(0)   | 805(1)  | 1339(8)    |
| 94(0)   | 824(0)  | 1347(1)    |
| 97(0)   | 827(1)  | 1356(0)    |
| 105(0)  | 854(4)  | 1456(2)    |
| 108(0)  | 858(2)  | 1476(0)    |
| 119(1)  | 912(6)  | 1477(1)    |
| 123(0)  | 916(3)  | 1490(6)    |
| 139(0)  | 936(3)  | 1491(3)    |
| 148(1)  | 938(2)  | 1493(13)   |
| 160(0)  | 941(2)  | 1496(14)   |
| 172(1)  | 944(0)  | 1514(4)    |
| 191(1)  | 953(1)  | 1519(5)    |
| 216(2)  | 957(3)  | 1571(10)   |
| 222(0)  | 964(2)  | 1941(387)  |
| 243(0)  | 971(5)  | 2074(511)  |
| 254(0)  | 991(6)  | 2079(989)  |
| 284(4)  | 998(3)  | 2113(1485) |
| 317(4)  | 1006(8) | 2138(453)  |
| 362(0)  | 1018(3) | 2850(117)  |
| 373(8)  | 1026(1) | 2882(42)   |
| 379(2)  | 1038(1) | 3065(41)   |
| 416(3)  | 1054(2) | 3067(14)   |
| 424(6)  | 1056(0) | 3068(33)   |
| 430(3)  | 1107(6) | 3069(31)   |
| 432(15) | 1113(0) | 3078(44)   |
| 442(2)  | 1147(0) | 3080(50)   |
| 444(12) | 1153(0) | 3083(7)    |
| 463(3)  | 1168(8) | 3090(20)   |
| 473(3)  | 1172(4) | 3115(20)   |
| 488(42) | 1195(1) | 3116(1)    |
| 495(19) | 1203(2) | 3118(34)   |
| 503(17) | 1230(5) | 3119(29)   |

---

|         |          |          |
|---------|----------|----------|
| 517(33) | 1238(11) | 3120(8)  |
| 539(3)  | 1241(11) | 3123(40) |
| 547(5)  | 1244(2)  | 3134(3)  |
| 556(34) | 1259(11) | 3135(25) |
| 559(8)  | 1270(3)  | 3139(26) |
| 572(37) | 1279(4)  | 3141(52) |
| 587(48) | 1284(7)  | 3143(46) |
| 599(23) | 1291(3)  | 3178(19) |

---

**Table S32.** Harmonic vibrational frequencies (in  $\text{cm}^{-1}$ ) and infrared intensities (in parentheses, in  $\text{km/mol}$ ) for the  $(\text{nor})_2\text{Co}_2(\text{CO})_5$  structure **5T-7**

| B3PW91  |          |           |
|---------|----------|-----------|
| 26(1)   | 576(42)  | 1287(24)  |
| 28(0)   | 761(2)   | 1294(2)   |
| 41(0)   | 763(12)  | 1299(3)   |
| 53(0)   | 769(26)  | 1309(6)   |
| 56(0)   | 773(10)  | 1319(10)  |
| 66(0)   | 799(0)   | 1329(1)   |
| 67(0)   | 805(1)   | 1331(6)   |
| 73(0)   | 828(1)   | 1339(0)   |
| 76(0)   | 829(4)   | 1339(0)   |
| 83(0)   | 850(1)   | 1471(1)   |
| 89(0)   | 853(3)   | 1471(0)   |
| 98(0)   | 911(2)   | 1485(6)   |
| 99(2)   | 911(1)   | 1487(1)   |
| 113(1)  | 929(4)   | 1488(9)   |
| 126(3)  | 936(6)   | 1489(4)   |
| 138(1)  | 948(1)   | 1492(6)   |
| 145(3)  | 952(0)   | 1494(11)  |
| 162(1)  | 953(1)   | 1518(3)   |
| 187(6)  | 960(5)   | 1521(1)   |
| 191(9)  | 963(1)   | 1968(397) |
| 205(2)  | 973(1)   | 2044(746) |
| 242(1)  | 990(6)   | 2091(914) |
| 252(1)  | 1003(17) | 2098(869) |
| 262(11) | 1005(1)  | 2137(505) |
| 327(1)  | 1008(5)  | 3052(16)  |
| 348(2)  | 1018(4)  | 3054(32)  |
| 354(1)  | 1031(0)  | 3056(23)  |
| 364(19) | 1049(1)  | 3063(38)  |
| 384(7)  | 1061(3)  | 3069(33)  |
| 396(17) | 1109(16) | 3070(47)  |
| 406(1)  | 1114(7)  | 3074(51)  |
| 410(17) | 1138(0)  | 3079(26)  |
| 415(6)  | 1139(0)  | 3079(43)  |
| 418(1)  | 1168(13) | 3082(19)  |
| 435(1)  | 1177(7)  | 3105(6)   |
| 447(30) | 1196(1)  | 3108(8)   |
| 454(1)  | 1203(3)  | 3110(69)  |
| 461(9)  | 1224(7)  | 3113(15)  |

---

|         |          |          |
|---------|----------|----------|
| 467(13) | 1235(12) | 3116(22) |
| 475(4)  | 1238(3)  | 3116(37) |
| 480(29) | 1249(9)  | 3120(26) |
| 499(68) | 1256(9)  | 3128(34) |
| 513(25) | 1260(7)  | 3132(16) |
| 543(11) | 1265(4)  | 3136(51) |
| 547(1)  | 1274(1)  | 3140(47) |
| 555(79) | 1283(26) | 3146(19) |

---

**Table S33.** Harmonic vibrational frequencies (in  $\text{cm}^{-1}$ ) and infrared intensities (in parentheses, in  $\text{km/mol}$ ) for the  $(\text{nor})_2\text{Co}_2(\text{CO})_6$  structure **6T-1**

| B3PW91  |          |            |
|---------|----------|------------|
| 11(1)   | 625(47)  | 1300(2)    |
| 15(0)   | 664(1)   | 1301(3)    |
| 24(0)   | 760(94)  | 1304(4)    |
| 29(1)   | 762(31)  | 1309(7)    |
| 43(0)   | 774(5)   | 1326(8)    |
| 47(0)   | 777(10)  | 1328(7)    |
| 60(0)   | 804(2)   | 1337(1)    |
| 67(1)   | 806(5)   | 1338(0)    |
| 70(0)   | 822(24)  | 1346(0)    |
| 74(0)   | 824(21)  | 1351(3)    |
| 77(0)   | 834(2)   | 1465(108)  |
| 82(0)   | 835(2)   | 1473(3)    |
| 90(0)   | 879(21)  | 1474(0)    |
| 101(2)  | 883(22)  | 1488(2)    |
| 125(1)  | 941(2)   | 1490(7)    |
| 127(1)  | 942(3)   | 1490(5)    |
| 142(1)  | 949(5)   | 1491(6)    |
| 152(1)  | 950(11)  | 1496(12)   |
| 161(1)  | 953(0)   | 1496(2)    |
| 175(0)  | 958(0)   | 1524(2)    |
| 198(1)  | 977(3)   | 1524(1)    |
| 219(1)  | 977(3)   | 1777(534)  |
| 248(2)  | 986(8)   | 2073(669)  |
| 274(6)  | 989(12)  | 2078(222)  |
| 291(25) | 1018(2)  | 2099(1525) |
| 317(1)  | 1025(10) | 2139(771)  |
| 349(1)  | 1033(2)  | 3050(32)   |
| 350(0)  | 1035(2)  | 3063(36)   |
| 359(1)  | 1061(2)  | 3072(39)   |
| 379(10) | 1063(4)  | 3074(35)   |
| 400(5)  | 1094(19) | 3075(19)   |
| 406(0)  | 1111(35) | 3078(38)   |
| 410(11) | 1138(2)  | 3079(33)   |
| 432(9)  | 1139(0)  | 3086(30)   |
| 439(3)  | 1162(50) | 3089(40)   |
| 450(11) | 1175(54) | 3091(11)   |
| 456(6)  | 1182(1)  | 3114(6)    |



---

|         |          |          |
|---------|----------|----------|
| 461(1)  | 1187(24) | 3117(9)  |
| 467(25) | 1214(10) | 3120(23) |
| 478(9)  | 1215(6)  | 3122(28) |
| 484(19) | 1249(7)  | 3124(33) |
| 487(30) | 1249(1)  | 3125(23) |
| 500(42) | 1252(4)  | 3135(25) |
| 511(27) | 1254(1)  | 3137(36) |
| 533(26) | 1263(8)  | 3145(26) |
| 545(13) | 1268(7)  | 3148(35) |
| 550(1)  | 1275(0)  | 3150(21) |
| 554(3)  | 1275(5)  | 3154(22) |

---

**Table S34.** Harmonic vibrational frequencies (in  $\text{cm}^{-1}$ ) and infrared intensities (in parentheses, in  $\text{km/mol}$ ) for the  $(\text{nor})_2\text{Co}_2(\text{CO})_6$  structure **6S-2**

| B3PW91  |          |            |
|---------|----------|------------|
| 7(0)    | 651(75)  | 1295(2)    |
| 27(1)   | 672(38)  | 1299(3)    |
| 34(0)   | 748(82)  | 1299(0)    |
| 45(0)   | 759(67)  | 1300(2)    |
| 50(0)   | 765(7)   | 1326(7)    |
| 64(0)   | 771(5)   | 1330(9)    |
| 69(0)   | 799(2)   | 1341(0)    |
| 73(0)   | 812(1)   | 1342(6)    |
| 80(0)   | 816(20)  | 1345(0)    |
| 81(1)   | 823(28)  | 1347(2)    |
| 96(1)   | 833(2)   | 1471(0)    |
| 104(0)  | 837(1)   | 1477(0)    |
| 109(0)  | 878(21)  | 1488(6)    |
| 114(0)  | 885(18)  | 1490(4)    |
| 130(1)  | 941(1)   | 1492(6)    |
| 133(2)  | 947(0)   | 1493(5)    |
| 152(1)  | 955(2)   | 1495(7)    |
| 191(0)  | 956(26)  | 1500(15)   |
| 193(0)  | 957(6)   | 1523(8)    |
| 208(1)  | 963(0)   | 1528(3)    |
| 219(1)  | 967(2)   | 1540(267)  |
| 242(3)  | 977(3)   | 1792(287)  |
| 257(0)  | 989(25)  | 1941(489)  |
| 258(3)  | 996(32)  | 2078(814)  |
| 317(9)  | 1014(2)  | 2092(1405) |
| 347(0)  | 1023(1)  | 2131(1003) |
| 348(1)  | 1040(9)  | 3063(16)   |
| 357(2)  | 1043(4)  | 3073(26)   |
| 364(2)  | 1056(3)  | 3074(41)   |
| 403(8)  | 1059(0)  | 3076(36)   |
| 413(0)  | 1102(11) | 3077(29)   |
| 417(1)  | 1121(1)  | 3084(35)   |
| 421(14) | 1137(37) | 3095(16)   |
| 436(4)  | 1143(4)  | 3096(26)   |
| 445(6)  | 1152(22) | 3100(25)   |
| 461(0)  | 1154(34) | 3101(18)   |
| 466(11) | 1191(2)  | 3123(11)   |
| 468(6)  | 1193(1)  | 3124(4)    |

---

|          |         |          |
|----------|---------|----------|
| 479(4)   | 1209(1) | 3127(6)  |
| 491(12)  | 1210(3) | 3127(28) |
| 510(6)   | 1236(1) | 3128(21) |
| 513(4)   | 1238(2) | 3131(35) |
| 538(36)  | 1246(5) | 3133(34) |
| 543(20)  | 1253(3) | 3147(23) |
| 547(28)  | 1264(4) | 3154(3)  |
| 550(1)   | 1271(7) | 3159(28) |
| 566(100) | 1281(5) | 3159(25) |
| 607(55)  | 1282(6) | 3163(13) |

---

**Table S35.** Harmonic vibrational frequencies (in  $\text{cm}^{-1}$ ) and infrared intensities (in parentheses, in  $\text{km/mol}$ ) for the  $(\text{nor})_2\text{Co}_2(\text{CO})_6$  structure **6S-3**

| B3PW91 |          |            |
|--------|----------|------------|
| 29(1)  | 655(76)  | 1298(2)    |
| 34(1)  | 667(11)  | 1299(0)    |
| 42(0)  | 738(108) | 1299(2)    |
| 45(1)  | 758(70)  | 1303(7)    |
| 49(0)  | 769(6)   | 1324(12)   |
| 58(0)  | 770(2)   | 1327(7)    |
| 65(0)  | 803(7)   | 1339(0)    |
| 74(0)  | 805(26)  | 1342(1)    |
| 83(1)  | 807(3)   | 1343(2)    |
| 89(0)  | 824(19)  | 1348(0)    |
| 90(2)  | 829(3)   | 1472(0)    |
| 101(1) | 837(3)   | 1472(1)    |
| 109(4) | 877(21)  | 1487(5)    |
| 119(1) | 881(19)  | 1487(2)    |
| 134(5) | 943(0)   | 1488(2)    |
| 139(1) | 944(1)   | 1492(7)    |
| 154(0) | 956(15)  | 1493(19)   |
| 163(2) | 957(2)   | 1496(9)    |
| 176(0) | 959(1)   | 1514(82)   |
| 196(1) | 959(1)   | 1522(2)    |
| 201(2) | 979(2)   | 1525(42)   |
| 236(2) | 981(3)   | 1825(622)  |
| 277(7) | 986(57)  | 1997(918)  |
| 279(1) | 991(18)  | 2074(124)  |
| 316(4) | 1021(4)  | 2083(1464) |
| 321(2) | 1025(0)  | 2134(1134) |
| 350(1) | 1036(12) | 3057(19)   |
| 353(2) | 1040(2)  | 3058(14)   |
| 380(3) | 1061(1)  | 3073(39)   |
| 391(3) | 1061(2)  | 3075(24)   |
| 401(5) | 1084(15) | 3075(30)   |
| 407(1) | 1103(12) | 3077(31)   |
| 419(1) | 1139(37) | 3086(39)   |
| 426(7) | 1139(27) | 3087(30)   |
| 434(6) | 1156(2)  | 3092(22)   |
| 452(4) | 1161(51) | 3097(25)   |
| 461(1) | 1183(4)  | 3121(10)   |
| 471(6) | 1185(0)  | 3125(3)    |

---

|         |          |          |
|---------|----------|----------|
| 472(13) | 1211(0)  | 3126(42) |
| 496(12) | 1214(6)  | 3127(8)  |
| 513(7)  | 1240(2)  | 3128(21) |
| 528(20) | 1245(3)  | 3130(15) |
| 534(26) | 1249(4)  | 3135(32) |
| 541(42) | 1250(2)  | 3140(7)  |
| 549(1)  | 1263(16) | 3147(36) |
| 549(0)  | 1272(5)  | 3149(14) |
| 562(15) | 1273(5)  | 3155(28) |
| 571(27) | 1274(7)  | 3174(11) |

---

**Table S36.** Harmonic vibrational frequencies (in  $\text{cm}^{-1}$ ) and infrared intensities (in parentheses, in  $\text{km}/\text{mol}$ ) for the  $(\text{nor})_2\text{Co}_2(\text{CO})_6$  structure **6T-4**

| B3PW91  |          |            |
|---------|----------|------------|
| 25(0)   | 645(4)   | 1297(4)    |
| 33(0)   | 696(28)  | 1298(1)    |
| 48(0)   | 743(77)  | 1301(2)    |
| 50(0)   | 767(13)  | 1303(3)    |
| 54(0)   | 772(9)   | 1327(10)   |
| 56(0)   | 777(7)   | 1328(2)    |
| 60(0)   | 802(1)   | 1338(0)    |
| 61(0)   | 806(4)   | 1341(0)    |
| 69(0)   | 815(11)  | 1342(1)    |
| 73(0)   | 829(8)   | 1346(1)    |
| 76(0)   | 833(6)   | 1472(0)    |
| 85(1)   | 836(3)   | 1476(1)    |
| 89(0)   | 878(11)  | 1487(4)    |
| 98(0)   | 886(17)  | 1489(3)    |
| 126(2)  | 941(0)   | 1490(4)    |
| 135(1)  | 943(0)   | 1493(7)    |
| 146(0)  | 954(6)   | 1494(6)    |
| 152(2)  | 955(0)   | 1500(2)    |
| 161(0)  | 959(1)   | 1521(2)    |
| 199(1)  | 962(6)   | 1528(0)    |
| 211(4)  | 967(5)   | 1552(178)  |
| 217(0)  | 974(5)   | 1756(319)  |
| 234(0)  | 991(16)  | 2083(972)  |
| 262(0)  | 999(31)  | 2088(341)  |
| 306(8)  | 1017(1)  | 2106(1656) |
| 311(1)  | 1019(2)  | 2141(534)  |
| 342(2)  | 1038(4)  | 3059(22)   |
| 350(1)  | 1040(6)  | 3063(26)   |
| 354(1)  | 1053(1)  | 3068(35)   |
| 365(14) | 1060(4)  | 3071(29)   |
| 382(13) | 1107(5)  | 3072(40)   |
| 387(5)  | 1112(3)  | 3074(21)   |
| 402(8)  | 1140(0)  | 3081(16)   |
| 413(0)  | 1144(23) | 3085(39)   |
| 416(1)  | 1147(7)  | 3093(29)   |
| 441(10) | 1165(71) | 3094(24)   |
| 443(11) | 1190(0)  | 3117(6)    |
| 450(43) | 1196(5)  | 3121(26)   |

---

|          |          |          |
|----------|----------|----------|
| 454(8)   | 1208(1)  | 3122(6)  |
| 462(25)  | 1213(4)  | 3124(6)  |
| 472(23)  | 1237(1)  | 3124(33) |
| 483(20)  | 1243(1)  | 3125(20) |
| 489(7)   | 1250(4)  | 3126(37) |
| 501(30)  | 1250(3)  | 3131(36) |
| 510(18)  | 1259(12) | 3140(30) |
| 547(1)   | 1262(4)  | 3147(13) |
| 551(0)   | 1278(4)  | 3151(28) |
| 606(120) | 1280(4)  | 3152(43) |

---

**Table S37.** Harmonic vibrational frequencies (in  $\text{cm}^{-1}$ ) and infrared intensities (in parentheses, in  $\text{km/mol}$ ) for the  $(\text{nor})_2\text{Co}_2(\text{CO})_7$  structure **7S-1**

| B3PW91  |          |            |
|---------|----------|------------|
| 18(1)   | 554(24)  | 1285(8)    |
| 26(1)   | 562(15)  | 1294(2)    |
| 33(0)   | 572(27)  | 1297(2)    |
| 46(0)   | 647(58)  | 1301(1)    |
| 55(0)   | 669(47)  | 1304(2)    |
| 63(0)   | 738(138) | 1331(8)    |
| 70(0)   | 757(80)  | 1331(6)    |
| 75(1)   | 766(12)  | 1339(0)    |
| 83(0)   | 769(8)   | 1341(0)    |
| 91(1)   | 803(4)   | 1346(6)    |
| 95(0)   | 811(5)   | 1349(2)    |
| 97(1)   | 816(31)  | 1475(0)    |
| 105(2)  | 824(19)  | 1478(1)    |
| 113(2)  | 833(2)   | 1489(5)    |
| 123(1)  | 839(2)   | 1492(2)    |
| 132(3)  | 880(27)  | 1493(6)    |
| 138(2)  | 885(20)  | 1496(8)    |
| 148(3)  | 941(2)   | 1497(12)   |
| 151(2)  | 943(2)   | 1502(14)   |
| 160(2)  | 957(20)  | 1526(1)    |
| 196(2)  | 957(10)  | 1529(1)    |
| 201(0)  | 959(17)  | 1560(123)  |
| 204(1)  | 961(1)   | 1774(352)  |
| 226(2)  | 968(4)   | 2010(572)  |
| 268(7)  | 969(4)   | 2066(324)  |
| 274(3)  | 986(31)  | 2086(1080) |
| 293(9)  | 995(29)  | 2105(1387) |
| 327(0)  | 1013(1)  | 2145(967)  |
| 337(9)  | 1015(4)  | 3072(27)   |
| 347(1)  | 1041(12) | 3073(49)   |
| 359(1)  | 1044(6)  | 3074(34)   |
| 383(3)  | 1056(1)  | 3076(35)   |
| 393(4)  | 1057(4)  | 3077(26)   |
| 413(2)  | 1122(2)  | 3096(30)   |
| 415(1)  | 1126(0)  | 3098(23)   |
| 424(1)  | 1139(44) | 3099(18)   |
| 436(7)  | 1143(1)  | 3103(25)   |
| 448(10) | 1145(27) | 3104(18)   |



---

|         |          |          |
|---------|----------|----------|
| 454(2)  | 1162(67) | 3122(12) |
| 459(18) | 1197(4)  | 3124(27) |
| 461(2)  | 1198(0)  | 3127(2)  |
| 469(2)  | 1209(1)  | 3128(35) |
| 488(14) | 1210(4)  | 3129(36) |
| 490(19) | 1236(1)  | 3132(19) |
| 511(37) | 1237(3)  | 3133(26) |
| 519(28) | 1251(5)  | 3150(19) |
| 529(70) | 1251(2)  | 3156(20) |
| 545(10) | 1266(5)  | 3161(21) |
| 548(13) | 1267(12) | 3168(16) |
| 549(11) | 1285(2)  | 3182(7)  |

---

**Table S38.** Harmonic vibrational frequencies (in  $\text{cm}^{-1}$ ) and infrared intensities (in parentheses, in  $\text{km/mol}$ ) for the  $(\text{nor})_2\text{Co}_2(\text{CO})_7$  structure **7S-2**

| B3PW91  |          |           |
|---------|----------|-----------|
| 23(0)   | 549(1)   | 1279(2)   |
| 34(0)   | 557(30)  | 1283(13)  |
| 52(0)   | 567(31)  | 1289(16)  |
| 58(0)   | 574(32)  | 1301(0)   |
| 60(0)   | 583(94)  | 1303(1)   |
| 72(0)   | 587(45)  | 1323(8)   |
| 79(0)   | 602(117) | 1323(9)   |
| 82(0)   | 757(2)   | 1333(6)   |
| 86(0)   | 760(14)  | 1335(4)   |
| 87(0)   | 761(5)   | 1342(1)   |
| 100(0)  | 766(25)  | 1346(0)   |
| 101(0)  | 799(1)   | 1472(0)   |
| 103(0)  | 805(1)   | 1474(0)   |
| 110(0)  | 832(2)   | 1487(1)   |
| 113(1)  | 834(2)   | 1490(3)   |
| 116(0)  | 846(6)   | 1492(4)   |
| 122(0)  | 847(1)   | 1495(8)   |
| 124(0)  | 913(4)   | 1495(7)   |
| 135(0)  | 914(11)  | 1501(10)  |
| 148(1)  | 942(1)   | 1522(2)   |
| 152(0)  | 943(1)   | 1526(1)   |
| 187(2)  | 952(1)   | 1960(393) |
| 201(0)  | 956(3)   | 2077(71)  |
| 220(3)  | 957(2)   | 2086(497) |
| 224(2)  | 960(9)   | 2099(968) |
| 226(1)  | 970(2)   | 2108(769) |
| 234(8)  | 972(2)   | 2123(824) |
| 267(14) | 998(9)   | 2164(721) |
| 353(9)  | 1006(12) | 3067(30)  |
| 356(6)  | 1012(1)  | 3067(21)  |
| 361(35) | 1020(1)  | 3068(58)  |
| 364(33) | 1033(0)  | 3069(35)  |
| 385(23) | 1038(0)  | 3080(40)  |
| 396(1)  | 1060(1)  | 3084(31)  |
| 404(15) | 1061(1)  | 3086(34)  |
| 408(7)  | 1117(5)  | 3096(23)  |
| 416(3)  | 1118(7)  | 3098(10)  |
| 428(8)  | 1140(0)  | 3101(9)   |

---

|          |          |          |
|----------|----------|----------|
| 435(100) | 1149(1)  | 3115(10) |
| 445(5)   | 1178(3)  | 3117(21) |
| 447(35)  | 1181(8)  | 3118(37) |
| 459(4)   | 1205(1)  | 3119(33) |
| 463(2)   | 1212(1)  | 3122(34) |
| 474(12)  | 1243(9)  | 3123(25) |
| 478(4)   | 1251(14) | 3137(32) |
| 484(11)  | 1253(4)  | 3141(37) |
| 499(48)  | 1254(3)  | 3150(22) |
| 533(13)  | 1259(7)  | 3170(13) |
| 542(0)   | 1262(4)  | 3176(15) |
| 546(6)   | 1275(0)  | 3183(15) |

---

**Table S39.** Harmonic vibrational frequencies (in  $\text{cm}^{-1}$ ) and infrared intensities (in parentheses, in  $\text{km/mol}$ ) for the  $(\text{nor})_2\text{Co}_2(\text{CO})_7$  structure **7S-3**

| B3PW91   |          |            |
|----------|----------|------------|
| -10(0)   | 545(0)   | 1280(1)    |
| 26(0)    | 547(0)   | 1289(21)   |
| 39(0)    | 561(52)  | 1290(10)   |
| 50(0)    | 580(53)  | 1298(0)    |
| 56(0)    | 587(35)  | 1298(1)    |
| 68(0)    | 590(161) | 1323(13)   |
| 76(0)    | 595(36)  | 1323(3)    |
| 81(0)    | 756(0)   | 1333(6)    |
| 85(0)    | 756(1)   | 1333(0)    |
| 92(0)    | 759(8)   | 1346(2)    |
| 94(0)    | 760(39)  | 1346(1)    |
| 97(0)    | 804(0)   | 1475(0)    |
| 100(0)   | 804(6)   | 1475(0)    |
| 103(0)   | 834(0)   | 1491(5)    |
| 113(0)   | 834(2)   | 1491(2)    |
| 117(0)   | 842(2)   | 1497(16)   |
| 124(1)   | 843(5)   | 1497(5)    |
| 125(0)   | 911(2)   | 1498(15)   |
| 126(0)   | 912(14)  | 1498(1)    |
| 145(0)   | 942(2)   | 1526(1)    |
| 164(1)   | 942(0)   | 1526(1)    |
| 198(0)   | 952(0)   | 1965(381)  |
| 198(1)   | 952(4)   | 2075(150)  |
| 221(12)  | 963(0)   | 2089(379)  |
| 221(1)   | 963(6)   | 2097(639)  |
| 223(4)   | 968(0)   | 2106(732)  |
| 250(0)   | 968(1)   | 2125(1458) |
| 290(8)   | 1004(1)  | 2162(288)  |
| 351(126) | 1004(20) | 3069(39)   |
| 359(0)   | 1017(0)  | 3069(58)   |
| 360(3)   | 1017(2)  | 3071(63)   |
| 367(0)   | 1037(0)  | 3071(7)    |
| 387(2)   | 1037(0)  | 3078(0)    |
| 389(1)   | 1060(0)  | 3078(45)   |
| 399(0)   | 1060(2)  | 3089(44)   |
| 406(11)  | 1117(14) | 3089(17)   |
| 435(0)   | 1117(0)  | 3099(25)   |
| 435(49)  | 1143(0)  | 3099(12)   |

---

|         |          |          |
|---------|----------|----------|
| 438(45) | 1143(0)  | 3117(99) |
| 445(0)  | 1177(8)  | 3117(8)  |
| 445(13) | 1177(1)  | 3121(16) |
| 462(18) | 1204(2)  | 3121(0)  |
| 463(14) | 1204(1)  | 3125(4)  |
| 480(4)  | 1238(7)  | 3125(61) |
| 481(1)  | 1239(6)  | 3145(2)  |
| 488(0)  | 1253(27) | 3145(20) |
| 501(76) | 1253(0)  | 3148(5)  |
| 530(1)  | 1262(14) | 3148(66) |
| 534(24) | 1262(4)  | 3180(12) |
| 544(8)  | 1280(14) | 3181(5)  |

---

**Table S40.** Harmonic vibrational frequencies (in  $\text{cm}^{-1}$ ) and infrared intensities (in parentheses, in  $\text{km/mol}$ ) for the  $(\text{nor})_2\text{Co}_2(\text{CO})_7$  structure **7T-4**

| B3PW91  |          |            |
|---------|----------|------------|
| 1(0)    | 547(26)  | 1282(8)    |
| 12(1)   | 555(3)   | 1296(2)    |
| 19(1)   | 564(74)  | 1302(1)    |
| 26(0)   | 606(14)  | 1304(3)    |
| 31(0)   | 638(6)   | 1312(19)   |
| 37(0)   | 741(101) | 1327(8)    |
| 42(0)   | 767(31)  | 1329(6)    |
| 53(0)   | 768(39)  | 1340(0)    |
| 56(0)   | 775(24)  | 1341(0)    |
| 66(0)   | 804(2)   | 1347(3)    |
| 74(1)   | 804(1)   | 1349(4)    |
| 76(0)   | 810(14)  | 1474(0)    |
| 81(2)   | 829(28)  | 1474(0)    |
| 88(0)   | 832(2)   | 1490(2)    |
| 90(0)   | 841(35)  | 1490(4)    |
| 103(0)  | 878(17)  | 1491(7)    |
| 106(3)  | 887(56)  | 1492(7)    |
| 120(4)  | 941(1)   | 1496(12)   |
| 131(19) | 941(2)   | 1496(9)    |
| 140(1)  | 953(18)  | 1523(2)    |
| 142(1)  | 957(8)   | 1525(3)    |
| 155(7)  | 957(0)   | 1728(121)  |
| 185(1)  | 958(6)   | 1779(395)  |
| 194(0)  | 974(3)   | 1936(728)  |
| 201(0)  | 981(2)   | 2057(266)  |
| 258(24) | 989(32)  | 2074(813)  |
| 272(79) | 990(21)  | 2089(1460) |
| 294(8)  | 1016(1)  | 2136(841)  |
| 329(0)  | 1026(18) | 3059(37)   |
| 339(2)  | 1032(2)  | 3070(39)   |
| 344(0)  | 1041(14) | 3073(30)   |
| 369(6)  | 1057(4)  | 3076(35)   |
| 390(53) | 1066(13) | 3077(27)   |
| 398(26) | 1099(48) | 3083(26)   |
| 404(0)  | 1114(2)  | 3084(38)   |
| 407(1)  | 1139(0)  | 3086(22)   |
| 414(50) | 1145(1)  | 3088(21)   |
| 424(41) | 1154(86) | 3092(26)   |

---

|         |           |          |
|---------|-----------|----------|
| 430(2)  | 1180(104) | 3120(1)  |
| 446(26) | 1183(27)  | 3121(24) |
| 460(1)  | 1194(0)   | 3123(33) |
| 463(30) | 1209(2)   | 3125(5)  |
| 465(13) | 1218(34)  | 3127(29) |
| 475(1)  | 1239(2)   | 3128(40) |
| 484(33) | 1250(6)   | 3130(26) |
| 495(1)  | 1251(7)   | 3144(10) |
| 511(67) | 1255(8)   | 3146(9)  |
| 530(7)  | 1264(17)  | 3150(28) |
| 535(42) | 1266(7)   | 3151(44) |
| 546(37) | 1271(6)   | 3152(36) |

---

**Complete Gaussian 09 reference (Reference 22)**

M. J. Frisch; G. W. Trucks; H. B. Schlegel; G. E. Scuseria; M. A. Robb;  
J. R. Cheeseman; G. Scalmani; V. Barone; B. Mennucci; G. A. Petersson; H. Nakatsuji;  
M. Caricato; X. Li; H. P. Hratchian; A. F. Izmaylov; J. Bloino; G. Zheng;  
J. L. Sonnenberg; M. Hada; M. Ehara; K. Toyota; R. Fukuda; J. Hasegawa; M. Ishida;  
T. Nakajima; Y. Honda; O. Kitao; H. Nakai; T. Vreven; J. A. Montgomery, Jr.;  
J. E. Peralta; F. Ogliaro; M. Bearpark; J. J. Heyd; E. Brothers; K. N. Kudin;  
V. N. Staroverov; R. Kobayashi; J. Normand; K. Raghavachari; A. Rendell; J. C. Burant;  
S. S. Iyengar; J. Tomasi; M. Fessi; N. Rega; J. M. Millam; M. Klene; J. E. Knox;  
J. B. Cross; V. Bakken; C. Adamo; J. Jaramillo; R. Gomperts; R. E. Stratmann;  
O. Yazyev; A. J. Austin; R. Cammi; C. Pomelli; J. W. Ochterski; R. L. Martin; K. Morokuma;  
V. G. Zakrzewski; G. A. Voth; P. Salvador; J. J. Dannenberg; S. Dapprich; A. D. Daniels;  
O. Farkas; J. B. Foresman; J. V. Ortiz; J. Cioslowski; and D. J. Fox, J. A. Gaussian 09, Revision A.02,  
Gaussian, Inc., Wallingford CT, 2009.
